# Supplementary material for: Anti-allergic drug azelastine suppresses colon tumorigenesis by directly targeting ARF1 to inhibit IQGAP1-ERK-Drp1-mediated mitochondrial fission
Source: PubMed Central journal article supplement (PMC7778598; doi:10.7150/thno.48698), 2021-01-01
Supplement: thnov11p1828s1.pdf [file thnov11p1828s1.pdf]

## Supplementary Figure Legends

**Figure S1. Azelastine inhibits the proliferation of CRC cells with no toxic effects in mice.** (A) Comparison of colony formation ability of HT29, DLD1 and HCT116 cells treated with indicated concentrations of azelastine. (B) Soft agar colony formation. (C) Body weight of nude mice. (D) Representative images of the liver, kidney and lung tissues stained with hematoxylin and eosin (H & E). Bars, SD; \*,  $P < 0.05$ ; \*\*,  $P < 0.001$ .

**Figure S2. Analysis of differentially expressed proteins in azelastine-treated HT29 cells by PLGEM.** (A) PLGEM fitting of the abundance of azelastine-regulated proteins. (B) Q–Q plot of the residual versus standard normal. (C) Residual distribution along with the rank of mean abundances. (D) Histogram of residuals of identified proteins.

**Figure S3. Azelastine induces mitochondrial dysfunction in CRC cells.** Western blotting was performed to determine the expression of Bcl-xL, Bax, and Bcl-2 in HT29 and DLD1 cells treated with indicated concentrations of azelastine for 48 h.

**Figure S4. Activation of the ERK pathway significantly abrogates the effect of azelastine on mitochondria.** (A) Immunofluorescent staining was carried out with MitoTracker® probe to compare the morphology of mitochondria in the azelastine-treated HT29 and DLD1 cells. (B) p-ERK expression was detected by Western blotting. (C–F) CRC cells overexpressing MEK were treated with indicated concentrations of azelastine for 48 h. WST-1, immunofluorescent staining, and Western blotting were performed to compare cell viability (D), morphology of mitochondria (E), and p-Drp1 expression (F). (G) Comparison of anti-proliferation ability of azelastine and Rotenone

in HT29 and DLD1 cells. Bars, SD; \*,  $P < 0.05$ ; \*\*,  $P < 0.01$ .

**Figure S5. ARF1, but not HRH1, mediates the anticancer effect of azelastine.** (A) HRH1-deficient CRC cell lines were established. (B) WST-1 assay was used to measure cell viability in HRH1-deficient CRC cell lines treated with various concentrations of azelastine. (C) Experimental schema of DARTS technology to identify the direct target of azelastine. (D) ARF1-deficient CRC cell lines were established. (E) WST-1 assay was used to measure cell viability in ARF1-deficient HT29 and DLD1 cells treated with various concentrations of azelastine. (F) HT29 and DLD1 cells were treated with Mdivi-1 (10 $\mu$ M) for 6 h, then treated with azelastine (20 $\mu$ M); WST-1 assay was used to compare the cell viability. Bars, SD; \*,  $P < 0.05$ ; \*\*,  $P < 0.01$ .

**Figure S6. ARF1 exerts its oncogenic function through ERK signaling.** (A) Successful establishment of ARF1-overexpressing HCT116 and RKO cells. (B) WST-1 assay was performed to determine cell proliferation rate in ARF1-overexpressing CRC cells and control cells. (C) The abilities of ARF1-overexpressing HCT116 and RKO cells as well as control cells to form colonies were examined. (D) Comparison of anchorage-independent growth ability by soft agar assay. (E-H) Comparison of p-ERK expression (E), cell proliferation rate (H), anchorage-dependent growth ability (F) and anchorage-independent growth ability (G) in ARF1-overexpressing CRC cells in the presence or absence of U0126 (5  $\mu$ M), and the control cells. (I) Successful establishment of inducible knockdown of ARF1 in HT29 and DLD1 cells. (J-L) Effect of ARF1 knockdown on proliferation (J) and anchorage-independent growth of HT29 and DLD1 cells (K). (L) Comparison of the morphology of mitochondria in ARF1-knockdown HT29 and DLD1 cells and control cells. Bars, SD; \*,  $P < 0.05$ . Bars, SD;

\*,  $P < 0.05$ ; \*\*,  $P < 0.01$ ; \*\*\*,  $P < 0.001$ .

**Figure S7. Clinical significance of ARF1.** (A) Comparison of ARF1 expression in 20 pairs of CRC tumors and adjacent normal tissues. (B) Data from starBase v3.0 showed that the expression of ARF1 was higher in various cancers than normal tissues. (C) Data from TCGA and GEO databases indicated that ARF1 expression was correlated with poor survival in various cancers. Bars, SD; \*,  $P < 0.05$ ; \*\*,  $P < 0.01$ ; \*\*\*,  $P < 0.001$ .

**Figure S8. Azelastine does not regulate ARF6 expression or activity in CRC cells.** The expression and activity of ARF6 in HT29 and DLD1 cells treated with different concentrations of azelastine for 48 h were measured.

**Figure S9. Azelastine directly binds to ARF1.** (A) Comparison of ARF1 expression and activity in the azelastine-treated tumor xenografts. (B) Biacore assay showed that ARF1 binds to azelastine with a  $K_d$  of  $1.74 \times 10^{-9}$ . (C) Biacore assay showed that ARF1-T48S mutant binds to azelastine with a significantly increased  $K_d$  of  $5.94 \times 10^{-7}$ .

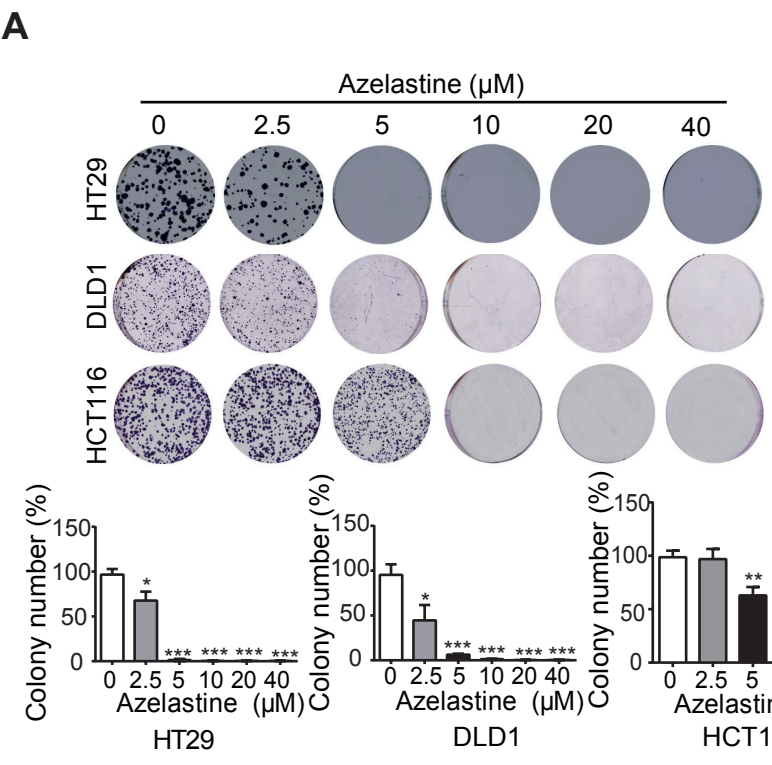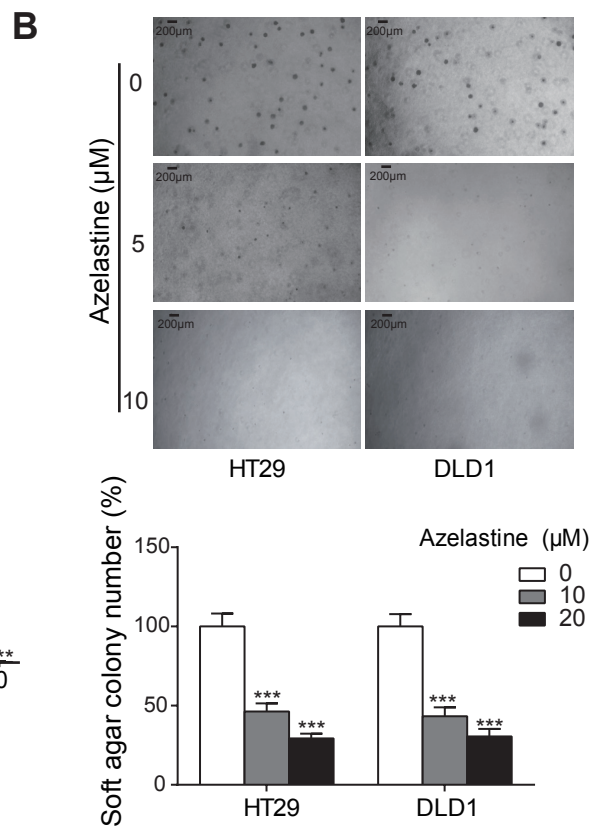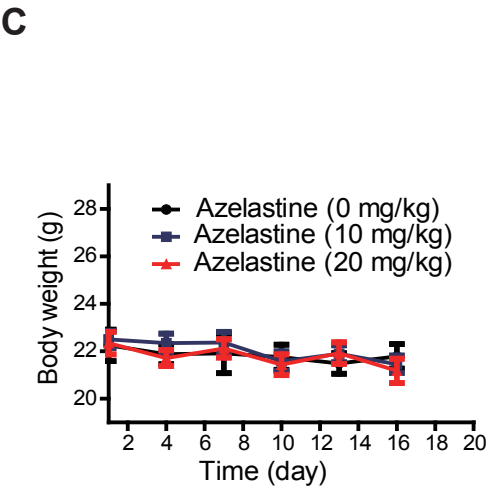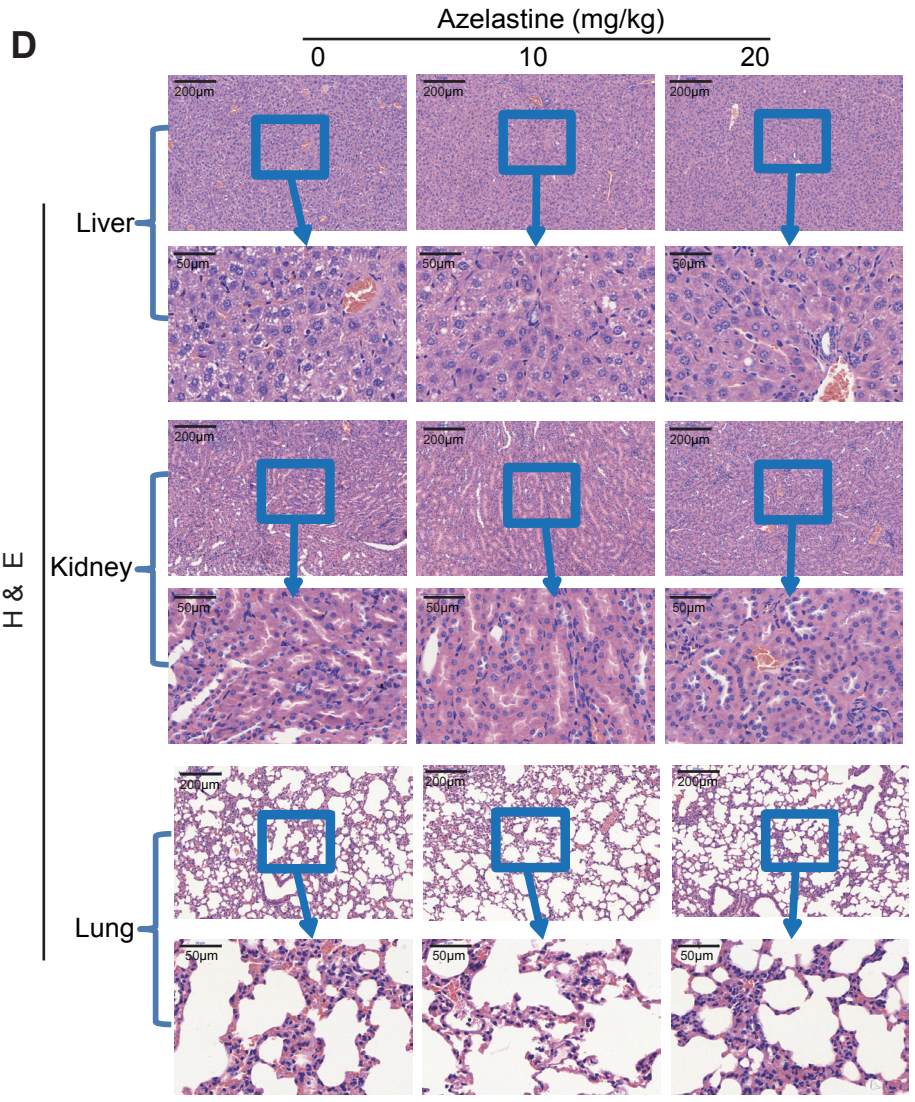

Figure S1



**A**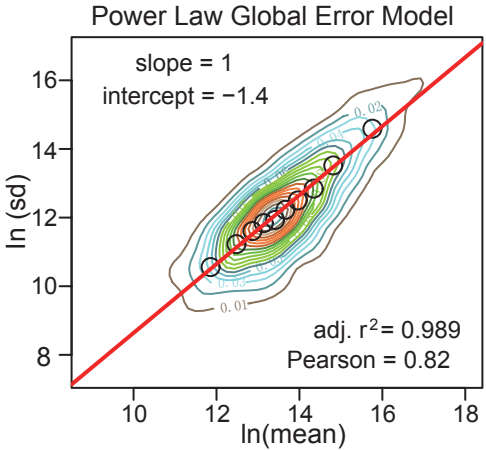**B**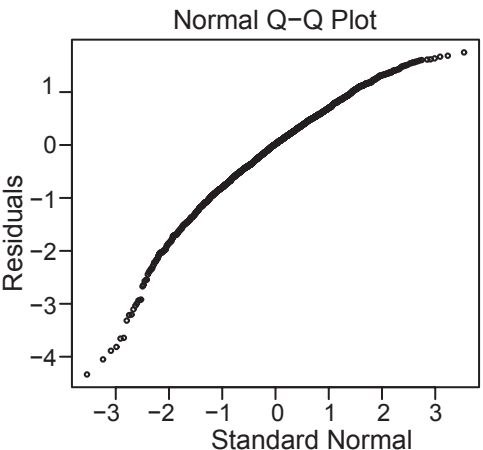**C**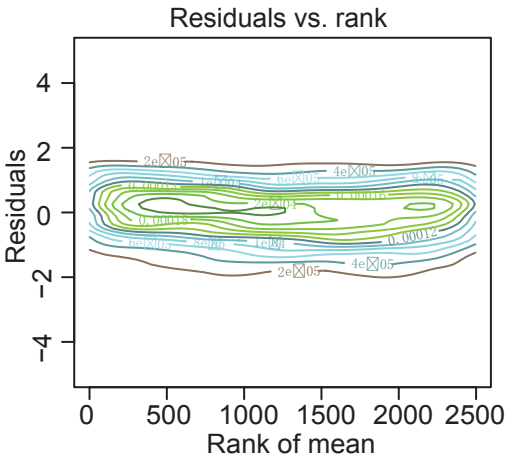**D**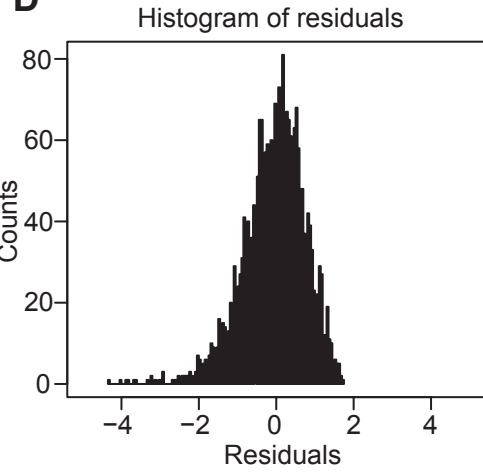

Figure S2

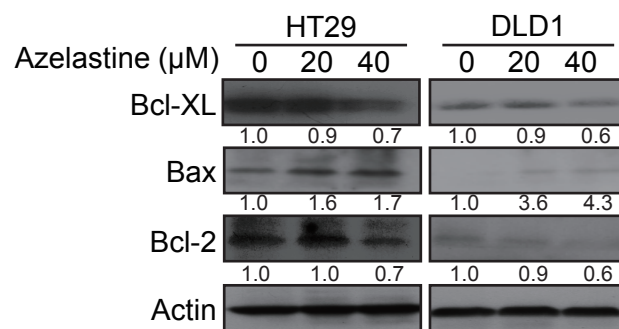

Figure S3

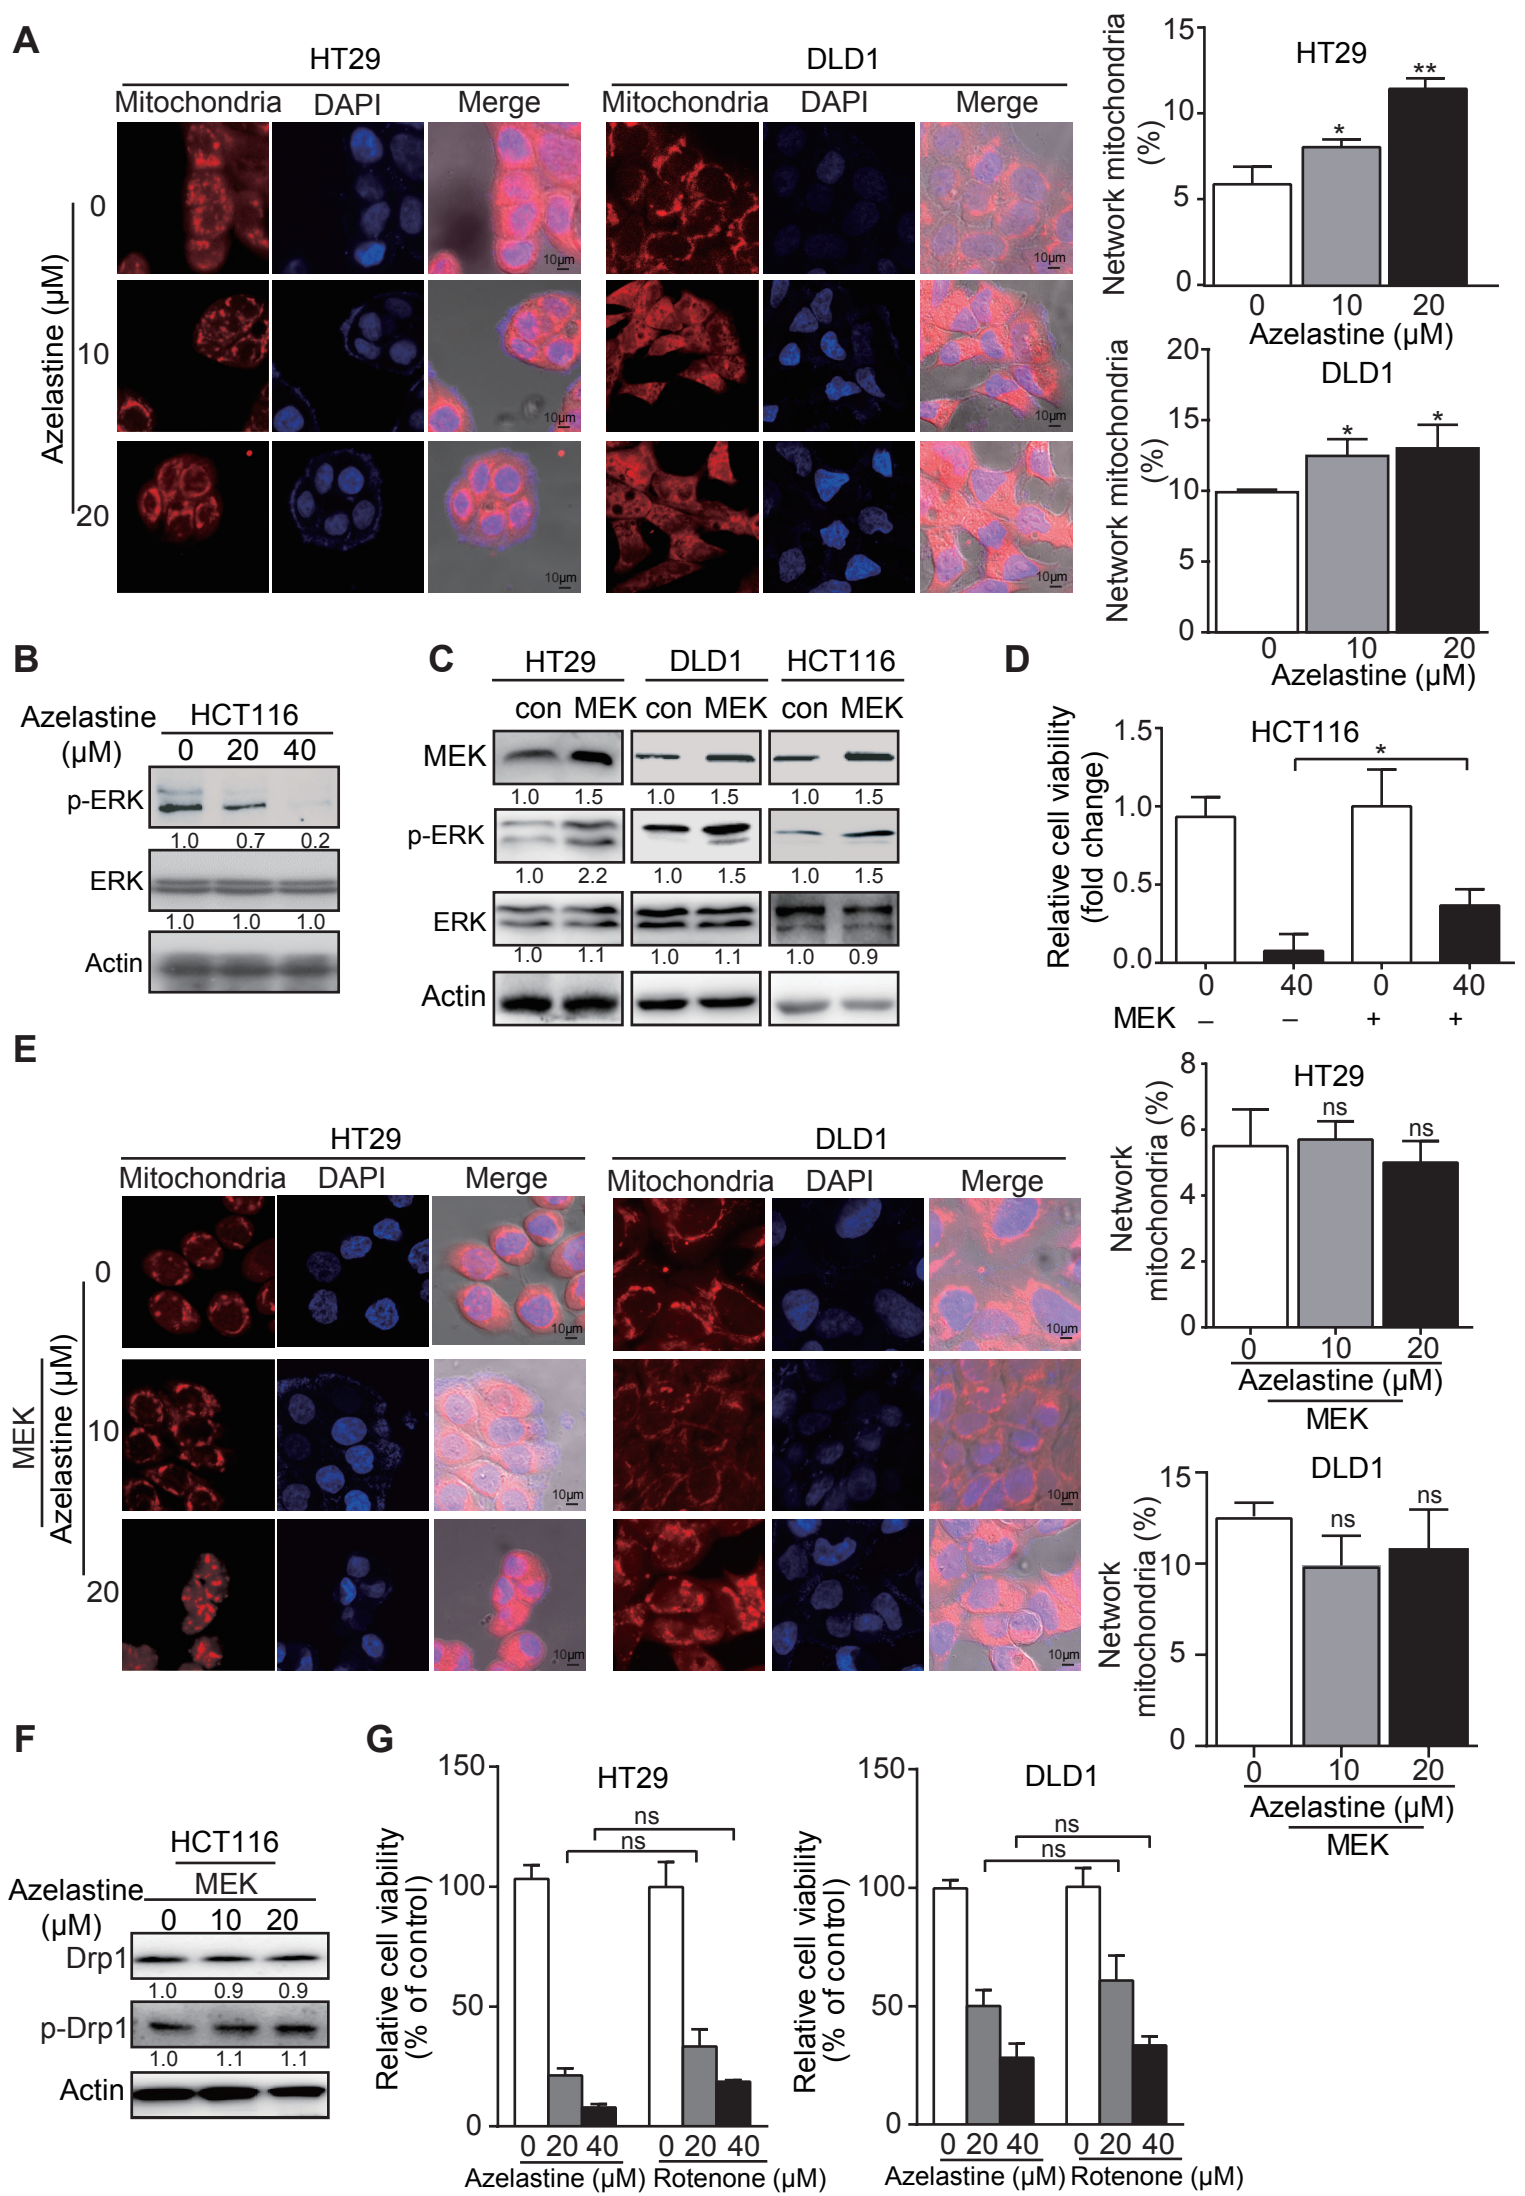

Figure S4

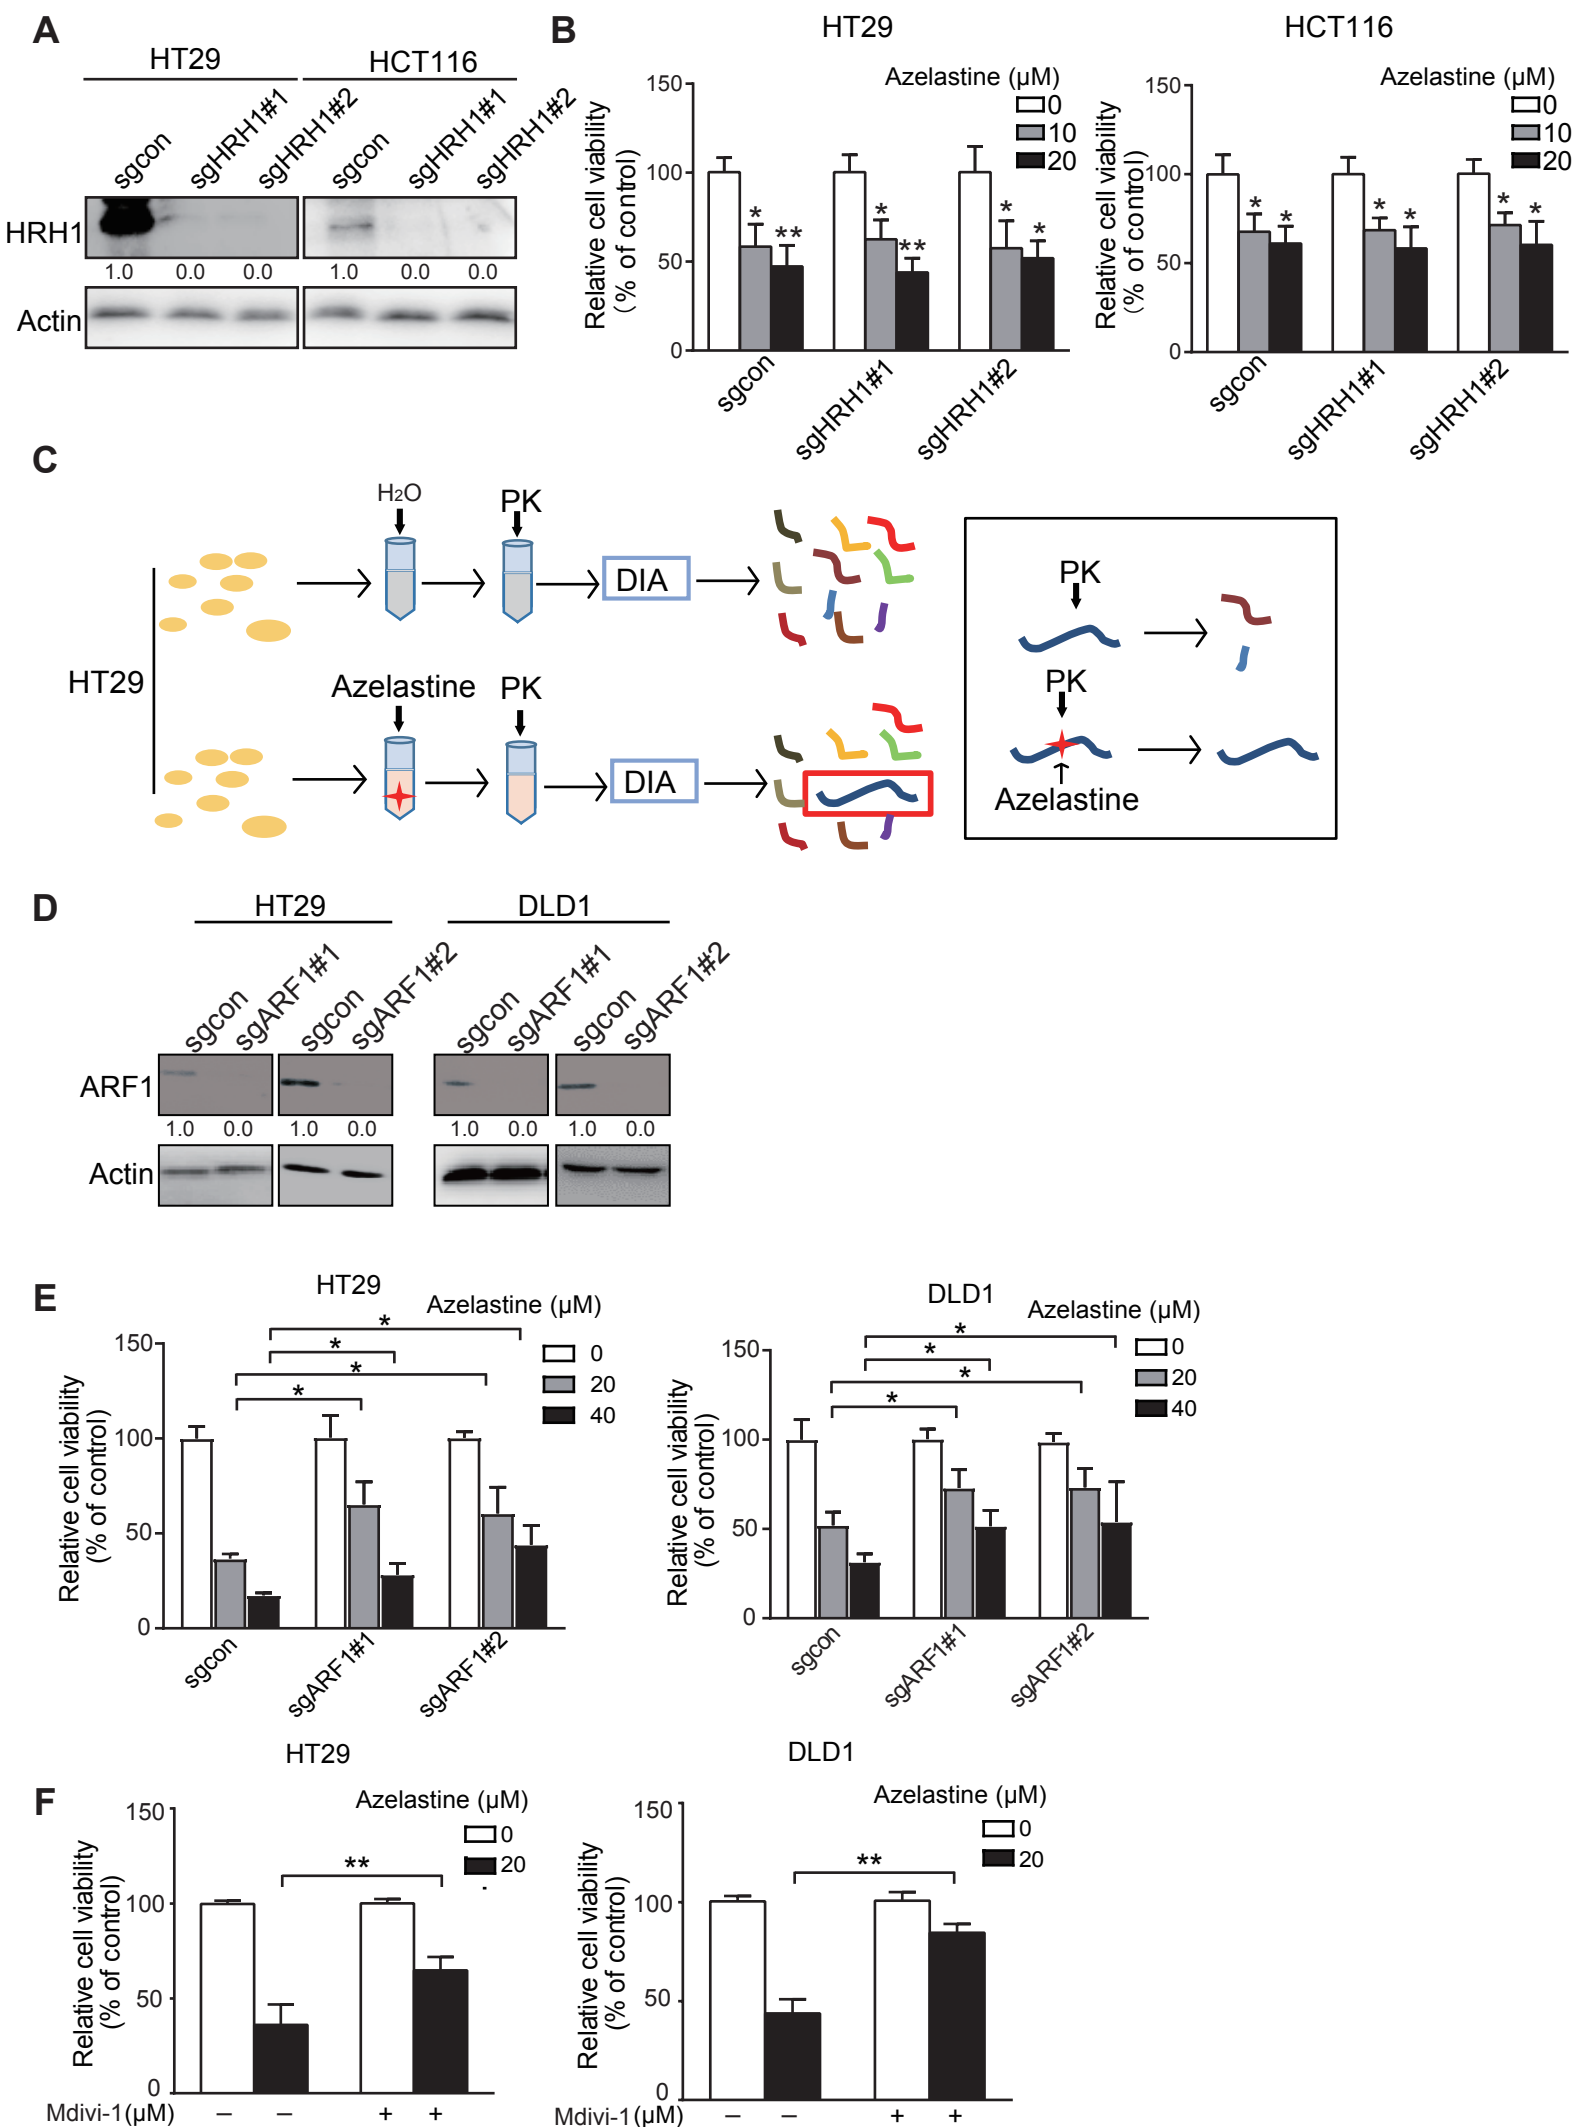

Figure S5

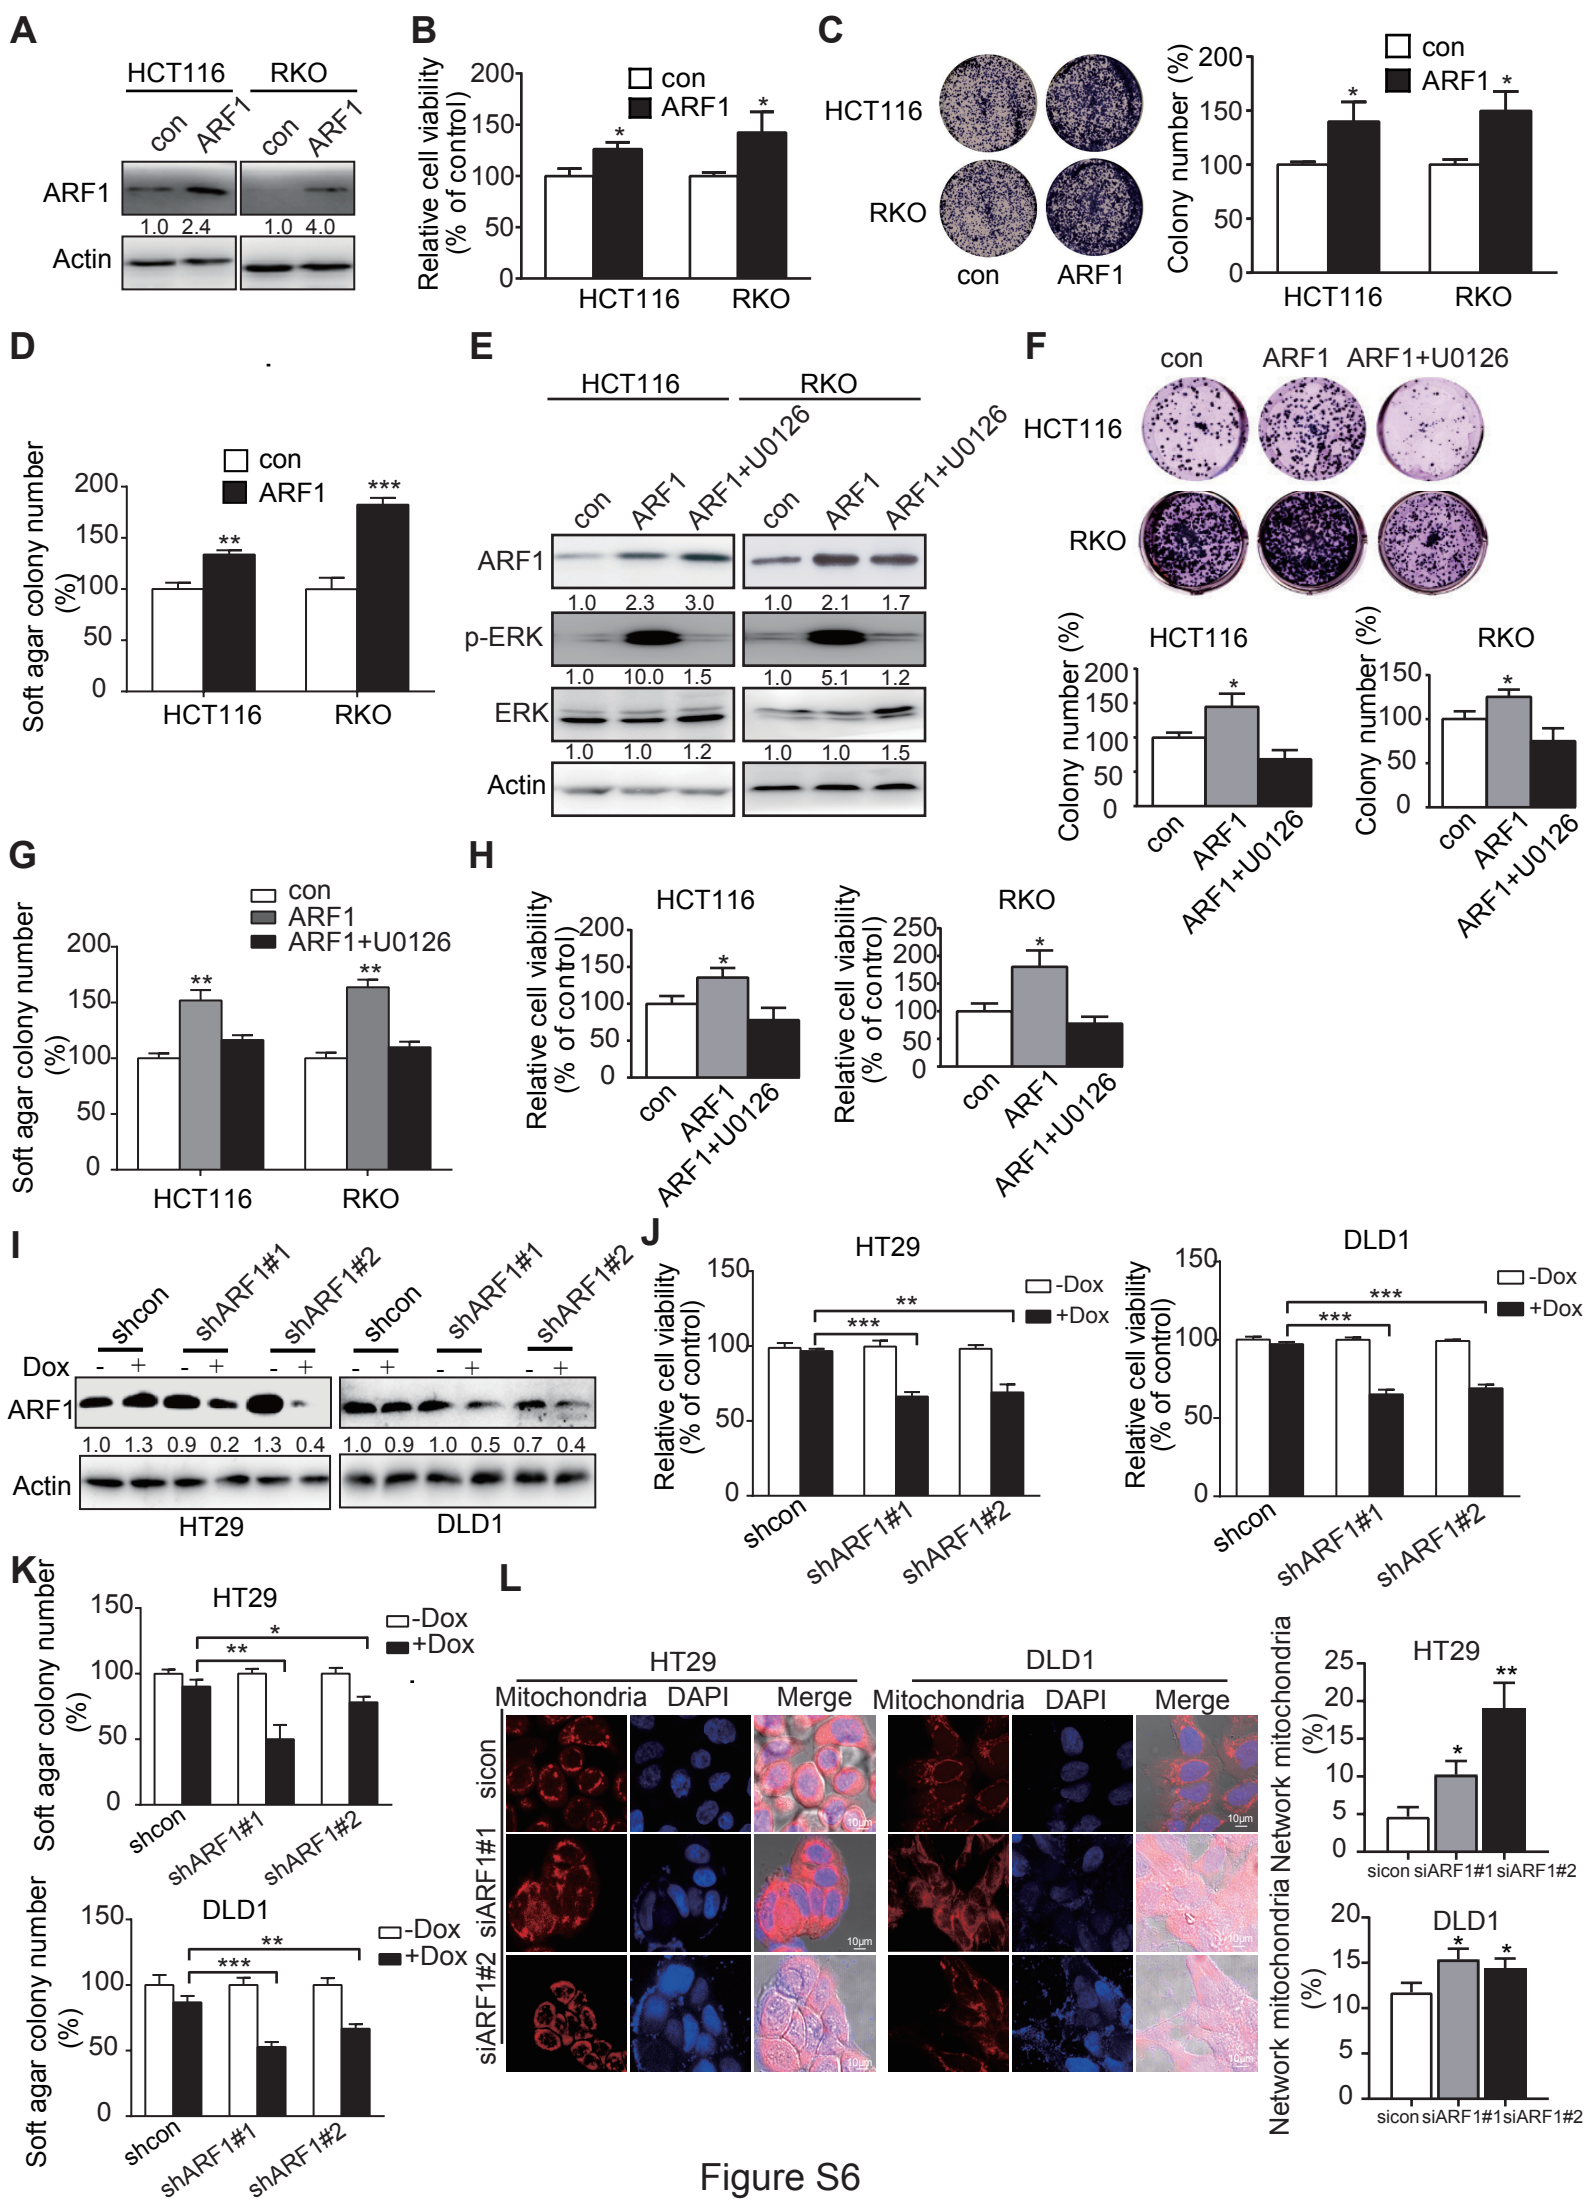

Figure S6



**A**

## Colorectal cancer and normal tissues

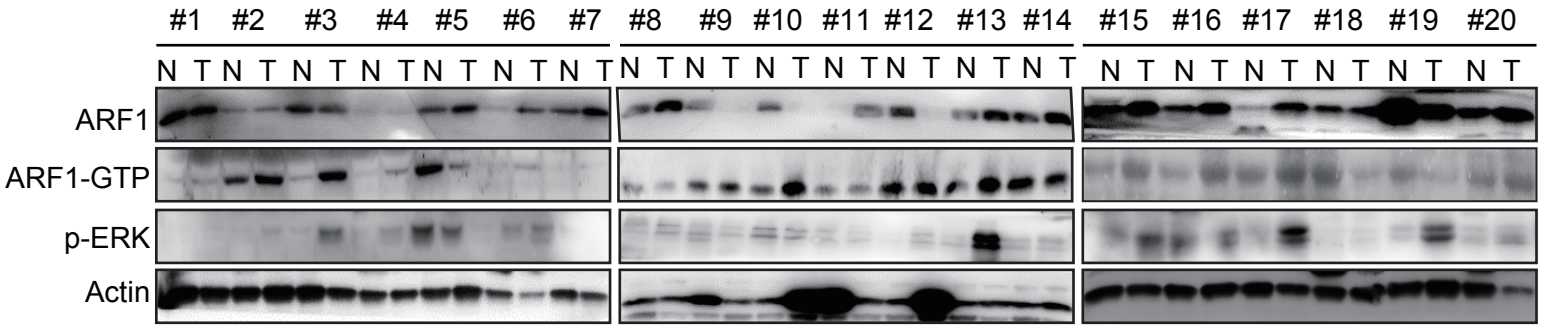**B**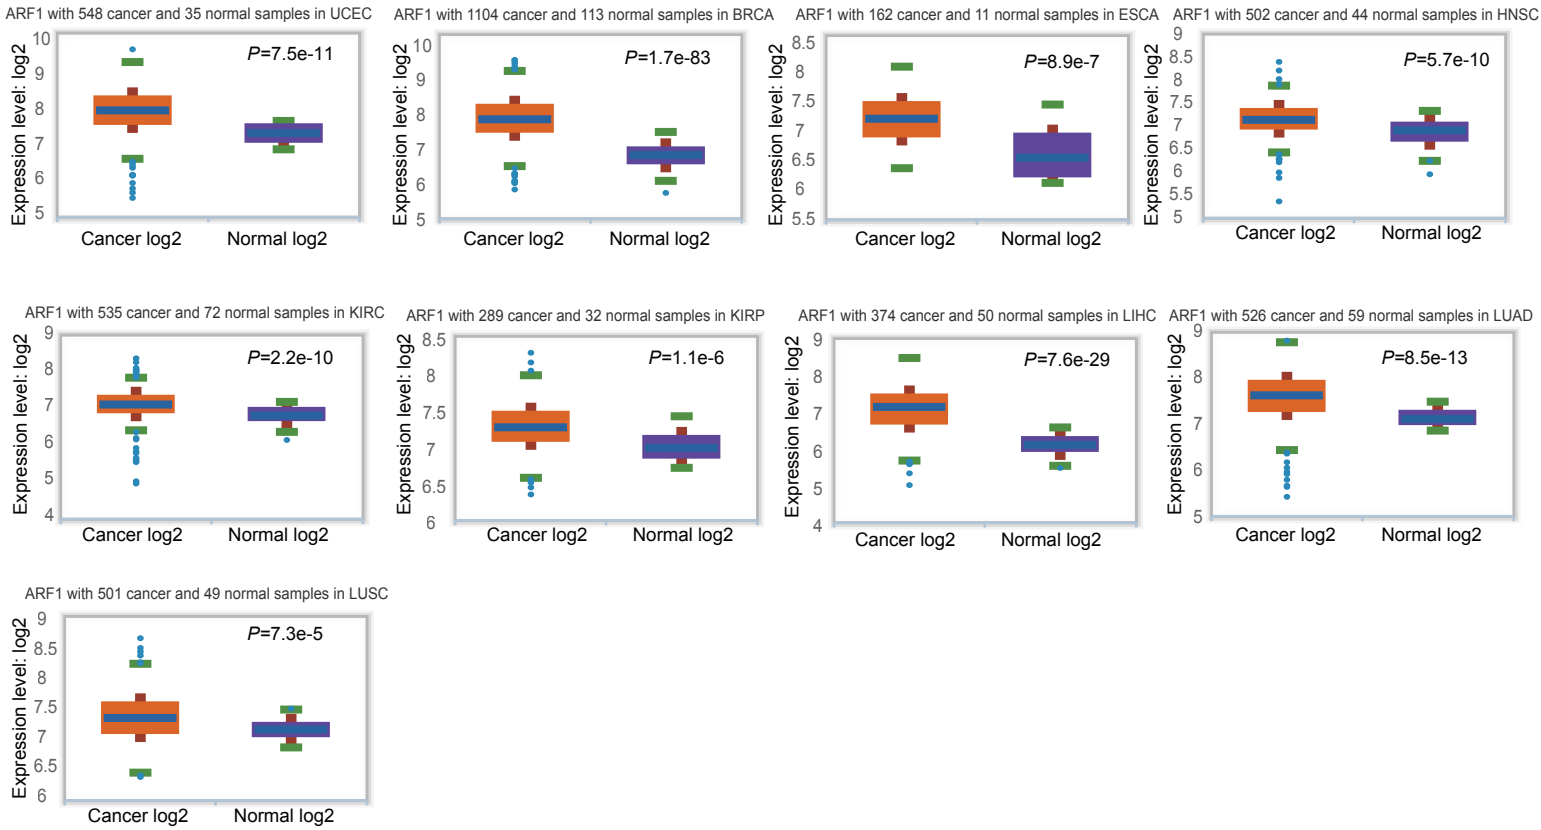**C**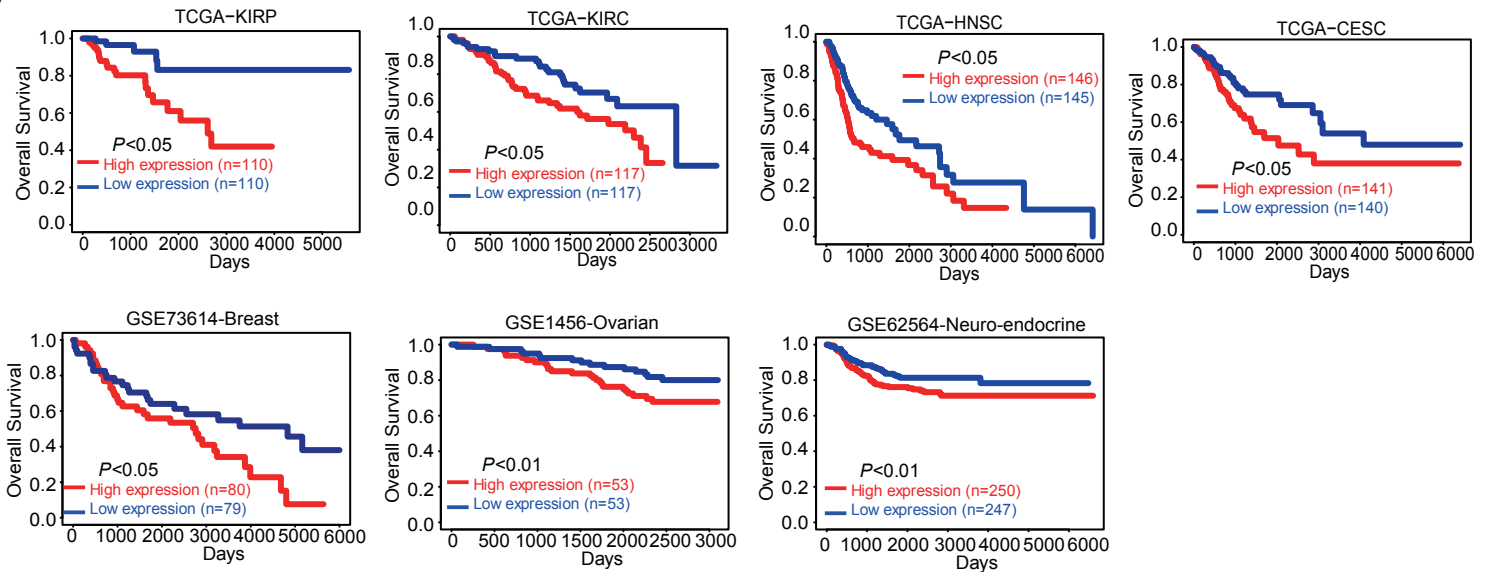

Figure S7



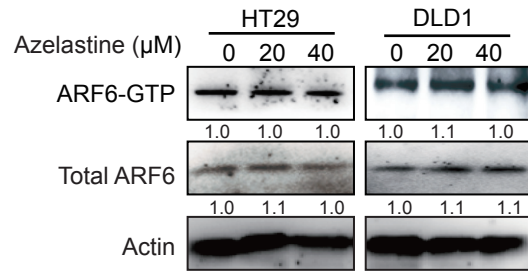

Figure S8

**A**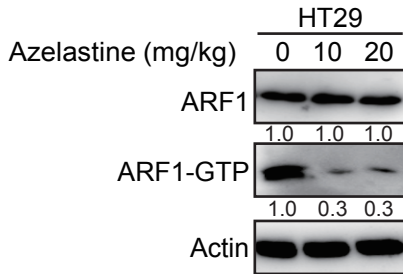**B**

## ARF1 - PBS medicine

| Curve                  | ka (1/Ms) | kd (1/s) | KD (M)   | Rmax (RU) | Conc (M) | tc       | Flow (ul/min) | kt (RU/Ms) | RI (RU) | Chi <sup>2</sup> (RU <sup>2</sup> ) | U-value |
|------------------------|-----------|----------|----------|-----------|----------|----------|---------------|------------|---------|-------------------------------------|---------|
|                        | 1.19E+07  | 0.02072  | 1.74E-09 | 12.01     |          | 5.45E+08 |               |            |         | 198                                 | 95      |
| Cycle: 2 150 $\mu$ M   |           |          |          |           | 1.50E-04 |          | 30            | 1.70E+09   | 172.6   |                                     |         |
| Cycle: 3 75 $\mu$ M    |           |          |          |           | 7.50E-05 |          | 30            | 1.70E+09   | 74.78   |                                     |         |
| Cycle: 4 37.5 $\mu$ M  |           |          |          |           | 3.75E-05 |          | 30            | 1.70E+09   | 28.07   |                                     |         |
| Cycle: 5 18.75 $\mu$ M |           |          |          |           | 1.88E-05 |          | 30            | 1.70E+09   | 3.839   |                                     |         |
| Cycle: 6 9.375 $\mu$ M |           |          |          |           | 9.38E-06 |          | 30            | 1.70E+09   | -10.35  |                                     |         |

**C**

## ARF1-T48S - PBS medicine

| Curve                  | ka (1/Ms) | kd (1/s) | KD (M)          | Rmax (RU) | Conc (M) | tc       | Flow (ul/min) | kt (RU/Ms) | RI (RU) | Chi <sup>2</sup> (RU <sup>2</sup> ) | U-value |
|------------------------|-----------|----------|-----------------|-----------|----------|----------|---------------|------------|---------|-------------------------------------|---------|
|                        | 1.28E+04  | 0.007602 | <b>5.94E-07</b> | 2.666     |          | 1.35E+17 |               |            |         | 0.443                               | 33      |
| Cycle: 5 150 $\mu$ M   |           |          |                 |           | 1.50E-04 |          | 30            | 4.18E+17   | 14.55   |                                     |         |
| Cycle: 6 75 $\mu$ M    |           |          |                 |           | 7.50E-05 |          | 30            | 4.18E+17   | 9.02    |                                     |         |
| Cycle: 7 37.5 $\mu$ M  |           |          |                 |           | 3.75E-05 |          | 30            | 4.18E+17   | 4.057   |                                     |         |
| Cycle: 8 18.75 $\mu$ M |           |          |                 |           | 1.88E-05 |          | 30            | 4.18E+17   | 1.526   |                                     |         |
| Cycle: 9 9.375 $\mu$ M |           |          |                 |           | 9.38E-06 |          | 30            | 4.18E+17   | 0.7115  |                                     |         |

Figure S9

**Table S1**

**The sequences of ARF1 siRNA and primers for cloning and mutation of ARF1- and IQGAP1-expressing plasmids**

**siRNA sequence**

|                 |                                                      |
|-----------------|------------------------------------------------------|
| <b>siARF1#1</b> | 5'-<br>CGAUCCUCUACAAGCUUAATTUUAAGCUUGUAGAGGAUCGTT-3' |
| <b>siARF1#2</b> | 5'-<br>GGGUCCGAUUUGCCAUCGATTUCGAUGGCAAUUCGGACCCTT-3' |

**primers for cloning and mutation**

|                                           |                                                                                                |
|-------------------------------------------|------------------------------------------------------------------------------------------------|
| <b>pET-28b-ARF1</b>                       | forward primer 5'-CGCGGATCCTGGACGGTTGGGATTAGCG -3'                                             |
|                                           | reverse primer 5'- CGCGAATTC GGAGGCAGCTTCTGGCACT -3'                                           |
| <b>pET-28b-ARF1<sup>T48S</sup></b>        | forward primer 5' - TGCAGGGAAGACCTCGATCCTCTA -3'                                               |
|                                           | reverse primer 5' - CTTCCCTGCAGCATCCAGGCC -3'                                                  |
| <b>pcDNA3.1-ARF1<sup>T48S</sup></b>       | forward primer 5- GCTGCAGGGAAGACCTCGATCCTCTA-3'                                                |
|                                           | reverse primer 5' - TGGTCTTCCCTGCAGCATCCAGGCC -3'                                              |
| <b>pcDNA3.1-ARF1<sup>G159C</sup></b>      | forward primer 5'-GTACATTCAGGCCACCGGCGCCACCAGC-3'                                              |
|                                           | reverse primer 5' - CGGTGGCCTGAATGTACCAGTTCCTGT-3'                                             |
| <b>pcDNA3.1-IQGAP1-ΔRGCT-flag</b>         | forward primer<br>5'-CGCCTCGAGTTACTTCCCGTAGAACTTTTTGTTGAGAA-3'                                 |
|                                           | reverse primer                                                                                 |
| <b>pcDNA3.1-IQGAP1-ΔRGCT/GR D-flag</b>    | forward primer<br>5'-TAGTCCAGTGTGGTGGGAATTCATGTCCGCCGCAGACGAG-3'                               |
|                                           | reverse primer<br>5'-<br>TGCTGGATATCTGCAGAATTCTTACTTGTCATCGTCGTCCTTGTAG-3'                     |
| <b>pcDNA3.1-IQGAP1-ΔRGCT/GR D/IQ-flag</b> | forward primer<br>5'-TAGTCCAGTGTGGTGGGAATTCATGTCCGCCGCAGACGAG-3'                               |
|                                           | reverse primer<br>5'-<br>TGCTGGATATCTGCAGAATTCTTACTTGTCATCGTCGTCCTTGTAGT<br>CAGGTTTCATCCCAT-3' |

**Table S2**  
**The list of FDA-approved drugs with the most significantly inhibitory effect in HT29 cells**

| <b>FDA-approved drugs</b>    | <b>Inhibitor ratio (%)</b> |
|------------------------------|----------------------------|
| Motolimod (VTX-2337)         | 100                        |
| Vitamin E                    | 100                        |
| Rivastigmine                 | 100                        |
| Cilengitide                  | 100                        |
| Marimastat (BB-2516)         | 100                        |
| Mepiroxol                    | 100                        |
| D panthenol                  | 100                        |
| Benzyl alcohol               | 100                        |
| Nialamide                    | 100                        |
| Ethosuximide                 | 99.2                       |
| EPZ-6438                     | 99.1                       |
| Hexylresorcinol              | 97.9                       |
| Ledipasvir (GS5885)          | 97.9                       |
| Oxytetracycline Dihydrate    | 97.7                       |
| Tranlycypromine (2-PCPA) HCl | 97.0                       |
| Micafungin Sodium            | 97.0                       |
| Pimecrolimus                 | 96.9                       |
| Dexamethasone Acetate        | 96.4                       |
| Artemisinin                  | 96.2                       |
| Batimastat (BB-94)           | 95.3                       |
| Fludarabine Phosphate        | 94.6                       |
| Edaravone                    | 94.6                       |
| Amprenavir                   | 94.3                       |
| DL-Panthenol                 | 94.1                       |
| Epacadostat (INCB024360)     | 94.0                       |
| Chloroxylenol                | 93.8                       |
| Doxapram HCl                 | 92.9                       |
| Salmeterol Xinafoate         | 92.7                       |
| Mitoxantrone HCl             | 92.6                       |
| Clofibric Acid               | 91.7                       |
| Dienogest                    | 91.5                       |
| Clomifene citrate            | 91.2                       |
| Maprotiline HCl              | 90.8                       |
| Clofoctol                    | 90.7                       |
| Fenbufen                     | 90.7                       |
| Phenazopyridine HCl          | 90.3                       |
| Sulfisoxazole                | 90.1                       |
| Rufinamide                   | 90.0                       |

|                                     |      |
|-------------------------------------|------|
| Acarbose                            | 90.0 |
| Azelastine HCl                      | 90.0 |
| Pidotimod                           | 89.4 |
| Loperamide HCl                      | 89.1 |
| Dapson                              | 89.1 |
| Serotonin HCl                       | 88.9 |
| Loxoprofen                          | 88.9 |
| Piromidic Acid                      | 88.7 |
| Etodolac                            | 88.5 |
| Fexofenadine HCl                    | 88.0 |
| Mecarbinat                          | 87.8 |
| Apatinib                            | 87.8 |
| Oseltamivir Phosphate               | 87.8 |
| Arecoline                           | 87.8 |
| Cefotaxime sodium                   | 87.6 |
| Atovaquone                          | 87.6 |
| Mupirocin                           | 87.5 |
| L-Thyroxine                         | 86.3 |
| Clorsulon                           | 86.3 |
| Clindamycin                         | 86.3 |
| Bufexamac                           | 86.3 |
| Uprosertib (GSK2141795)             | 86.3 |
| Miconazole                          | 86.1 |
| Miconazole Nitrate                  | 85.1 |
| Disulfiram                          | 84.5 |
| Tylosin tartrate                    | 84.4 |
| Itraconazole                        | 84.1 |
| Aripiprazole                        | 83.9 |
| Tofacitinib (CP-690550) Citrate     | 83.8 |
| Tivantinib (ARQ 197)                | 83.5 |
| Trifluridine                        | 83.1 |
| Chloroxine                          | 83.1 |
| Dexrazoxane HCl (ICRF-187, ADR-529) | 82.3 |
| Amisulpride                         | 82.3 |
| Lapatinib                           | 82.0 |
| Mestranol                           | 82.0 |
| Crenolanib (CP-868596)              | 82.0 |
| Isosorbide Mononitrate              | 81.5 |
| Lansoprazole                        | 80.8 |
| Piperazine                          | 80.2 |

**Table S3**  
**The differently expressed proteins in azelastine-treated HT29 cells**  
**(fold change  $\geq 1.5$ )**

| <b>Protein Accessions</b> | <b>Fold change</b> | <b>Protein Accessions</b> | <b>Fold change</b> |
|---------------------------|--------------------|---------------------------|--------------------|
| P51114                    | -6.832667548       | Q6Y7W6                    | -1.89311           |
| P98194                    | -4.881613599       | Q96C90                    | -1.86772           |
| P06493                    | -4.011846735       | Q9H2J4                    | -1.85013           |
| P49959                    | -3.778330327       | O60826                    | -1.84335           |
| Q96EE4                    | -3.713010603       | Q9H6Z4                    | -1.82366           |
| Q9UPY5                    | -3.594322012       | O43432                    | -1.81861           |
| Q8I WV7                   | -3.547035429       | Q9NRX1                    | -1.80696           |
| Q7LGA3                    | -3.411066361       | Q969X5                    | -1.80336           |
| Q9UNF1                    | -2.657584065       | Q9GZP4                    | -1.8026            |
| Q86TI2                    | -2.620597653       | Q06546                    | -1.78926           |
| Q13158                    | -2.529382974       | Q6ZXV5                    | -1.78211           |
| P49736                    | -2.518350892       | Q16850                    | -1.78099           |
| Q9GZP8                    | -2.448243532       | O00515                    | -1.77628           |
| Q9UKV3                    | -2.421533349       | P56545                    | -1.75239           |
| P49023                    | -2.421242407       | O14896                    | -1.74558           |
| Q8NBM4                    | -2.391938849       | Q9Y2Q5                    | -1.74329           |
| Q9H118                    | -2.351915695       | Q9BPX3                    | -1.74037           |
| O60832                    | -2.290401083       | Q92643                    | 1.75071            |
| P62857                    | -2.256702318       | P23368                    | 1.753112           |
| O75794                    | -2.238938717       | Q6P582                    | 1.756873           |
| P62829                    | -2.222693971       | Q7Z4Q2                    | 1.764169           |
| Q9UPT8                    | -2.126620775       | O96000                    | 1.767746           |
| P52292                    | -2.112608561       | O95168                    | 1.767765           |
| O95793                    | -2.102988027       | P13646                    | 1.768566           |
| O75909                    | -2.093797206       | P32320                    | 1.769238           |
| Q11201                    | -2.092881663       | Q96L92                    | 1.770828           |
| Q14554                    | -2.085752411       | Q9H330                    | 1.775943           |
| Q9UBB6                    | -2.083485385       | Q7KZI7                    | 1.780843           |
| Q96K17                    | -2.072919845       | Q9NTI5                    | 1.781345           |
| O14737                    | -2.06585936        | Q9NXV6                    | 1.787348           |
| Q9NPI6                    | -2.026963436       | Q9UHL4                    | 1.789826           |
| Q9GZZ9                    | -2.004030245       | Q9Y6M9                    | 1.791888           |
| Q8WVV4                    | -1.984775534       | P68871                    | 1.7925             |
| Q12849                    | -1.980742408       | Q9Y6C9                    | 1.792512           |
| Q96FZ2                    | -1.94034872        | Q13620                    | 1.792576           |
| Q92692                    | -1.934335601       | Q9GZN4                    | 1.798262           |
| Q5JSH3                    | -1.928809391       | A1L0T0                    | 1.799078           |
| Q9C0H2                    | -1.912084516       | O75348                    | 1.801763           |



|        |              |        |          |
|--------|--------------|--------|----------|
| Q13190 | -1.906999226 | P07910 | 1.823556 |
| P31930 | 1.825469952  | Q9Y639 | 2.125127 |
| P80188 | 1.830112256  | P13164 | 2.147616 |
| P16930 | 1.831148084  | P08727 | 2.154317 |
| Q9H1P3 | 1.835795556  | O00567 | 2.191989 |
| Q96N66 | 1.836272058  | P16403 | 2.1951   |
| Q7Z3B4 | 1.838581691  | P62736 | 2.201723 |
| Q9BPW8 | 1.842549825  | Q8IXQ6 | 2.201941 |
| P23142 | 1.84634062   | Q92974 | 2.207565 |
| Q93050 | 1.846548064  | Q9NVH1 | 2.216658 |
| Q9BVT8 | 1.867339359  | Q9NV70 | 2.24926  |
| Q03405 | 1.876755196  | P15313 | 2.257335 |
| P60059 | 1.878136991  | P63279 | 2.268476 |
| Q9GZQ8 | 1.887993316  | O60613 | 2.312953 |
| P48729 | 1.900969025  | P21796 | 2.326782 |
| Q9P0J0 | 1.901341864  | Q5VTL8 | 2.327317 |
| P54709 | 1.905999991  | Q8N4J0 | 2.422933 |
| P05165 | 1.911535858  | Q9Y277 | 2.471473 |
| Q9UIJ7 | 1.911776593  | Q9H061 | 2.494181 |
| P05787 | 1.915345603  | P45880 | 2.523518 |
| Q99623 | 1.916920168  | P35900 | 2.538734 |
| P14854 | 1.918578906  | Q6UXN9 | 2.574194 |
| Q15428 | 1.924644885  | P14927 | 2.614551 |
| Q92621 | 1.927851009  | P30046 | 2.628983 |
| Q04695 | 1.934041174  | P04004 | 2.705816 |
| Q99988 | 1.938474044  | Q14978 | 2.723349 |
| P60520 | 1.95314899   | Q9UI26 | 2.766125 |
| O96008 | 1.956607141  | Q9Y3D9 | 2.806933 |
| Q14254 | 1.963667206  | P26447 | 3.061833 |
| O43809 | 1.965736593  | Q8IWB7 | 3.282603 |
| Q14739 | 1.967841598  | Q8N684 | 3.319223 |
| Q99828 | 1.982049036  | P16401 | 3.445445 |
| Q9NP81 | 1.985789514  | Q96QV6 | 3.520274 |
| P61421 | 1.987312978  | O75367 | 3.555367 |
| P54886 | 2.003287332  | Q12996 | 3.649475 |
| P26358 | 2.005555685  | P62807 | 3.987542 |
| P24557 | 2.022355756  | P62805 | 4.083643 |
| P02538 | 2.036050801  | Q71DI3 | 4.252389 |
| Q12888 | 2.050255181  | P33778 | 4.302705 |
| Q96AB3 | 2.056791308  | P04908 | 4.467697 |
| Q9Y2X3 | 2.065400954  | P84243 | 4.639078 |
| Q92673 | 2.069227725  | P68431 | 4.787733 |
| P02647 | 2.082396233  | Q71UI9 | 5.200663 |

|        |             |        |          |
|--------|-------------|--------|----------|
| O94855 | 2.085935354 | Q9BTY7 | 9.535954 |
|--------|-------------|--------|----------|

**Table S4**  
**The list of 1056 FDA-approved drugs**

| <b>Number</b> | <b>Product Name</b>                 | <b>CAS Number</b> | <b>Number</b> | <b>Product Name</b>           | <b>CAS Number</b>          |
|---------------|-------------------------------------|-------------------|---------------|-------------------------------|----------------------------|
| 1             | Nelarabine                          | 121032-29-9       | 26            | Prasugrel                     | 150322-43-3                |
| 2             | Bleomycin Sulfate                   | 9041-93-4         | 27            | Ramelteon                     | 196597-26-9                |
| 3             | Clofarabine                         | 123318-82-1       | 28            | Cinacalcet HCl                | 364782-34-3                |
| 4             | Dacarbazine                         | 4342-03-4         | 29            | Celecoxib                     | 169590-42-5                |
| 5             | Dexrazoxane HCl (ICRF-187, ADR-529) | 149003-01-0       | 30            | Avagacestat (BMS-708163)      | 1146699-66-2               |
| 6             | Epirubicin HCl                      | 56390-09-1        | 31            | Vemurafenib (PLX4032, RG7204) | 918504-65-1                |
| 7             | Oxaliplatin                         | 61825-94-3        | 32            | Acarbose                      | 56180-94-0                 |
| 8             | Etoposide                           | 33419-42-0        | 33            | Adapalene                     | 106685-40-9                |
| 9             | Raloxifene HCl                      | 82640-04-8        | 34            | Altretamine                   | 645-05-6                   |
| 10            | Fludarabine Phosphate               | 75607-67-9        | 35            | Amisulpride                   | 71675-85-9                 |
| 11            | Flavopiridol (Alvocidib)            | 146426-40-6       | 36            | Aniracetam                    | 72432-10-1                 |
| 12            | Topotecan HCl                       | 119413-54-6       | 37            | Artemisinin                   | 63968-64-9                 |
| 13            | Letrozole                           | 112809-51-5       | 38            | Asenapine                     | 65576-45-6,<br>135883-08-8 |
| 14            | Temozolomide                        | 85622-93-1        | 39            | Benazepril HCl                | 86541-74-4                 |
| 15            | Tamoxifen                           | 10540-29-1        | 40            | Budesonide                    | 51333-22-3                 |
| 16            | Vincristine                         | 2068-78-2         | 41            | Bumetanide                    | 28395-03-1                 |
| 17            | Agomelatine                         | 138112-76-2       | 42            | Carmofur                      | 61422-45-5                 |
| 18            | Amuvatinib (MP-470)                 | 850879-09-3       | 43            | Cetirizine DiHCl              | 83881-52-1                 |
| 19            | Leflunomide                         | 75706-12-6        | 44            | Cilnidipine                   | 132203-70-4                |
| 20            | Enzalutamide (MDV3100)              | 915087-33-1       | 45            | Cilostazol                    | 73963-72-1                 |
| 21            | Dienogest                           | 65928-58-7        | 46            | Floxuridine                   | 50-91-9                    |
| 22            | Entecavir Hydrate                   | 209216-23-9       | 47            | FT-207 (NSC 148958)           | 17902-23-7                 |
| 23            | Nepafenac                           | 78281-72-8        | 48            | Ifosfamide                    | 3778-73-2                  |
| 24            | Rufinamide                          | 106308-44-5       | 49            | Megestrol Acetate             | 595-33-5                   |
| 25            | Posaconazole                        | 171228-49-2       | 50            | Mercaptopurine (6-MP)         | 50-44-2                    |

|    |                                   |              |     |                          |             |
|----|-----------------------------------|--------------|-----|--------------------------|-------------|
| 51 | Streptozotocin (STZ)              | 18883-66-4   | 76  | Acitretin                | 55079-83-9  |
| 52 | Dexamethasone (DHAP)              | 50-02-2      | 77  | Bafetinib (INNO-406)     | 859212-16-1 |
| 53 | Doxazosin Mesylate                | 77883-43-3   | 78  | Doripenem Hydrate        | 364622-82-2 |
| 54 | Edaravone                         | 89-25-8      | 79  | Gestodene                | 60282-87-3  |
| 55 | Ellagic acid                      | 476-66-4     | 80  | Drospirenone             | 67392-87-4  |
| 56 | Etodolac                          | 41340-25-4   | 81  | Ruxolitinib (INCB018424) | 941678-49-5 |
| 57 | Etomidate                         | 33125-97-2   | 82  | Isotretinoin             | 4759-48-2   |
| 58 | Felbamate                         | 25451-15-4   | 83  | Lopinavir                | 192725-17-0 |
| 59 | Fluconazole                       | 86386-73-4   | 84  | Meropenem                | 96036-03-2  |
| 60 | Flumazenil                        | 78755-81-4   | 85  | Mianserin HCl            | 21535-47-7  |
| 61 | Fluoxetine HCl                    | 56296-78-7   | 86  | Mosapride Citrate        | 112885-42-4 |
| 62 | Fluvoxamine maleate               | 61718-82-9   | 87  | Nafamostat Mesylate      | 82956-11-4  |
| 63 | Gatifloxacin                      | 112811-59-3  | 88  | Omeprazole               | 73590-58-6  |
| 64 | Genistein                         | 446-72-0     | 89  | Methimazole              | 60-56-0     |
| 65 | Glimepiride                       | 93479-97-1   | 90  | Metolazone               | 17560-51-9  |
| 66 | Ivermectin                        | 70288-86-7   | 91  | Cefoperazone             | 62893-19-0  |
| 67 | Ketoconazole                      | 65277-42-1   | 92  | Silodosin                | 160970-54-7 |
| 68 | Lansoprazole                      | 103577-45-3  | 93  | Riluzole                 | 1744-22-5   |
| 69 | Levetiracetam                     | 102767-28-2  | 94  | Risperidone              | 106266-06-2 |
| 70 | Lidocaine                         | 137-58-6     | 95  | Sulfapyridine            | 144-83-2    |
| 71 | Loratadine                        | 79794-75-5   | 96  | Sulfameter               | 651-06-9    |
| 72 | Losartan Potassium (DuP 753)      | 124750-99-8  | 97  | Prilocaine               | 721-50-6    |
| 73 | Rigosertib (ON-01910)             | 1225497-78-8 | 98  | Darunavir Ethanolate     | 635728-49-3 |
| 74 | Epothilone B (EPO906, Patupilone) | 152044-54-7  | 99  | Theophylline             | 58-55-9     |
| 75 | Amonafide                         | 69408-81-7   | 100 | Prednisone               | 53-03-2     |

|     |                         |                     |     |                                    |             |
|-----|-------------------------|---------------------|-----|------------------------------------|-------------|
| 101 | Acetylcysteine          | 616-91-1            | 126 | Tretinoin                          | 302-79-4    |
| 102 | Alendronate             | 121268-17-5         | 127 | Phenylbutazone                     | 50-33-9     |
| 103 | Ethinyl Estradiol       | 57-63-6             | 128 | Ezetimibe                          | 163222-33-1 |
| 104 | Naproxen                | 26159-34-2          | 129 | Enalaprilat Dihydrate              | 84680-54-6  |
| 105 | Nitazoxanide            | 55981-09-4          | 130 | Dofetilide                         | 115256-11-6 |
| 106 | Triamcinolone Acetonide | 76-25-5             | 131 | Isradipine                         | 75695-93-1  |
| 107 | Orlistat                | 96829-58-2          | 132 | Estrone                            | 53-16-7     |
| 108 | Allopurinol             | 315-30-0            | 133 | Flucytosine                        | 2022-85-7   |
| 109 | Zafirlukast             | 107753-78-6         | 134 | Trichlormethiazide                 | 133-67-5    |
| 110 | Acetaminophen           | 103-90-2,16958-94-4 | 135 | Loteprednol etabonate              | 82034-46-6  |
| 111 | Erythromycin            | 114-07-8            | 136 | (6-) $\epsilon$ -Aminocaproic acid | 60-32-2     |
| 112 | Amphotericin B          | 1397-89-3           | 137 | Aminoglutethimide                  | 125-84-8    |
| 113 | Ibuprofen               | 15687-27-1          | 138 | Aminophylline                      | 317-34-0    |
| 114 | Amprenavir              | 161814-49-9         | 139 | Amorolfine HCl                     | 78613-38-4  |
| 115 | Albendazole             | 54965-21-8          | 140 | Chloramphenicol                    | 56-75-7     |
| 116 | Chlorothiazide          | 58-94-6             | 141 | Flurbiprofen                       | 51543-39-6  |
| 117 | Methyldopa              | 555-30-6            | 142 | Disulfiram                         | 97-77-8     |
| 118 | Ursodiol                | 128-13-2            | 143 | Mesalamine                         | 89-57-6     |
| 119 | Nitrofurantoin          | 59-87-0             | 144 | Ipratropium Bromide                | 22254-24-6  |
| 120 | Ketoprofen              | 22071-15-4          | 145 | Sulfanilamide                      | 63-74-1     |
| 121 | Ketorolac               | 74103-07-4          | 146 | Betamethasone Dipropionate         | 5593-20-4   |
| 122 | Adenosine               | 58-61-7             | 147 | Meprednisone                       | 1247-42-3   |
| 123 | Zolmitriptan            | 139264-17-8         | 148 | Betamethasone valerate (Betnovate) | 2152-44-5   |
| 124 | Telbivudine             | 3424-98-4           | 149 | Praziquantel                       | 55268-74-1  |
| 125 | Monobenzone             | 103-16-2            | 150 | Busulfan                           | 55-98-1     |

|     |                     |             |     |                        |             |
|-----|---------------------|-------------|-----|------------------------|-------------|
| 151 | Carbamazepine       | 298-46-4    | 176 | Gemfibrozil            | 25812-30-0  |
| 152 | Hydrocortisone      | 50-23-7     | 177 | Indapamide             | 26807-65-8  |
| 153 | Torsemide           | 56211-40-6  | 178 | Mitotane               | 53-19-0     |
| 154 | Desonide            | 638-94-8    | 179 | Methylprednisolone     | 83-43-2     |
| 155 | Didanosine          | 69655-05-6  | 180 | Meloxicam              | 71125-38-7  |
| 156 | Divalproex Sodium   | 76584-70-8  | 181 | Mesna                  | 19767-45-4  |
| 157 | Emtricitabine       | 143491-57-0 | 182 | Methocarbamol          | 532-03-6    |
| 158 | Progesterone        | 57-83-0     | 183 | Prednisolone           | 50-24-8     |
| 159 | Lamivudine          | 134678-17-4 | 184 | Telmisartan            | 144701-48-4 |
| 160 | Eplerenone          | 107724-20-9 | 185 | Thiabendazole          | 148-79-8    |
| 161 | Hydrochlorothiazide | 58-93-5     | 186 | Guaifenesin            | 93-14-1     |
| 162 | Estradiol           | 50-28-2     | 187 | Rifabutin              | 72559-06-9  |
| 163 | Deferasirox         | 201530-41-8 | 188 | Nevirapine             | 129618-40-2 |
| 164 | Piroxicam           | 36322-90-4  | 189 | Esomeprazole Magnesium | 161973-10-0 |
| 165 | Gemcitabine         | 95058-81-4  | 190 | Nicotinic Acid         | 59-67-6     |
| 166 | Glipizide           | 29094-61-9  | 191 | Nimodipine             | 66085-59-4  |
| 167 | Glyburide           | 10238-21-8  | 192 | Nisoldipine            | 63675-72-9  |
| 168 | Fomepizole          | 7554-65-6   | 193 | Oxybutynin             | 5633-20-5   |
| 169 | Adefovir Dipivoxil  | 142340-99-6 | 194 | Enoxacin               | 74011-58-8  |
| 170 | Zalcitabine         | 7481-89-2   | 195 | Pitavastatin Calcium   | 147526-32-7 |
| 171 | Azathioprine        | 446-86-6    | 196 | Rifapentine            | 61379-65-5  |
| 172 | Indomethacin        | 53-86-1     | 197 | Suprofen               | 40828-46-4  |
| 173 | Paliperidone        | 144598-75-4 | 198 | Pyrazinamide           | 98-96-4     |
| 174 | Terbinafine         | 91161-71-6  | 199 | Quetiapine Fumarate    | 111974-72-2 |
| 175 | Levonorgestrel      | 797-63-7    | 200 | Rifampin               | 13292-46-1  |



|     |                               |             |     |                                    |             |
|-----|-------------------------------|-------------|-----|------------------------------------|-------------|
| 201 | Cefditoren Pivoxil            | 117467-28-4 | 226 | Chlorpheniramine Maleate           | 113-92-8    |
| 202 | Sulfadiazine                  | 68-35-9     | 227 | Fenoprofen Calcium                 | 34597-40-5  |
| 203 | Chlorprothixene               | 113-59-7    | 228 | Erdosteine                         | 84611-23-4  |
| 204 | Oxytetracycline (Terramycin)  | 79-57-2     | 229 | Betaxolol hydrochloride (Betoptic) | 63659-19-8  |
| 205 | Toremifene Citrate            | 89778-27-8  | 230 | Proparacaine HCl                   | 5875-06-9   |
| 206 | Ethionamide                   | 536-33-4    | 231 | Pranlukast                         | 103177-37-3 |
| 207 | Trifluridine                  | 70-00-8     | 232 | Oxfendazole                        | 53716-50-0  |
| 208 | Azacitidine                   | 320-67-2    | 233 | Carvedilol                         | 72956-09-3  |
| 209 | Vidarabine                    | 5536-17-4   | 234 | Atracurium Besylate                | 64228-81-5  |
| 210 | Teniposide                    | 29767-20-2  | 235 | Butoconazole nitrate               | 64872-77-1  |
| 211 | Stanozolol                    | 10418-03-8  | 236 | Azithromycin                       | 83905-01-5  |
| 212 | Tetrabenazine (Xenazine)      | 58-46-8     | 237 | Albendazole Oxide                  | 54029-12-8  |
| 213 | Rifaximin                     | 80621-81-4  | 238 | Flubendazole                       | 31430-15-6  |
| 214 | Simvastatin                   | 79902-63-9  | 239 | Chloroxine                         | 773-76-2    |
| 215 | Ramipril                      | 87333-19-5  | 240 | Lomustine                          | 13010-47-4  |
| 216 | Fenofibrate                   | 49562-28-9  | 241 | Chenodeoxycholic Acid              | 474-25-9    |
| 217 | Ranolazine                    | 95635-55-5  | 242 | Cimetidine                         | 51481-61-9  |
| 218 | Ranitidine                    | 66357-59-3  | 243 | Clemastine Fumarate                | 14976-57-9  |
| 219 | Acadesine                     | 2627-69-2   | 244 | Curcumin                           | 458-37-7    |
| 220 | Acetylcholine Chloride        | 60-31-1     | 245 | Bifonazole                         | 60628-96-8  |
| 221 | Acipimox                      | 51037-30-0  | 246 | Pefloxacin Mesylate                | 70458-95-6  |
| 222 | Aciclovir                     | 59277-89-3  | 247 | Metoprolol Tartrate                | 392-17-7    |
| 223 | Nifedipine                    | 21829-25-4  | 248 | Diethylstilbestrol                 | 56-53-1     |
| 224 | Amiloride HCl                 | 2016-88-8   | 249 | Diltiazem HCl                      | 33286-22-5  |
| 225 | Amlodipine besylate (Norvase) | 111470-99-6 | 250 | Diphenhydramine HCl                | 147-24-0    |

|     |                           |             |     |                       |             |
|-----|---------------------------|-------------|-----|-----------------------|-------------|
| 251 | Dapoxetine HCl            | 129938-20-1 | 276 | Tropicamide           | 1508-75-4   |
| 252 | Valaciclovir HCl          | 124832-27-5 | 277 | Pregnenolone          | 145-13-1    |
| 253 | Ganciclovir               | 82410-32-0  | 278 | Sulfamethoxazole      | 723-46-6    |
| 254 | Roxatidine Acetate HCl    | 93793-83-0  | 279 | Sulfisoxazole         | 127-69-5    |
| 255 | Protionamide              | 14222-60-7  | 280 | Crystal Violet        | 548-62-9    |
| 256 | Idoxuridine               | 54-42-2     | 281 | Haloperidol           | 52-86-8     |
| 257 | Sparfloxacin              | 110871-86-8 | 282 | Phenindione           | 83-12-5     |
| 258 | Felodipine                | 72509-76-3  | 283 | Alibendol             | 26750-81-2  |
| 259 | Deflazacort               | 14484-47-0  | 284 | Irsogladine           | 57381-26-7  |
| 260 | Nizatidine                | 76963-41-2  | 285 | Triamcinolone         | 124-94-7    |
| 261 | Carbidopa                 | 28860-95-9  | 286 | Nystatin (Fungicidin) | 1400-61-9   |
| 262 | Valsartan                 | 137862-53-4 | 287 | Isoniazid             | 54-85-3     |
| 263 | Dipyridamole              | 58-32-2     | 288 | Levofloxacin          | 100986-85-4 |
| 264 | Hydroxyurea               | 127-07-1    | 289 | Enalapril Maleate     | 76095-16-4  |
| 265 | Potassium Iodide          | 7681-11-0   | 290 | Menadione             | 58-27-5     |
| 266 | Tropisetron               | 105826-92-4 | 291 | Methoxsalen           | 298-81-7    |
| 267 | Nicotinamide (Vitamin B3) | 98-92-0     | 292 | Miconazole Nitrate    | 22832-87-7  |
| 268 | Vitamin B12               | 68-19-9     | 293 | Sulfamethizole        | 144-82-1    |
| 269 | Diclofenac Sodium         | 15307-79-6  | 294 | Sulbactam             | 68373-14-8  |
| 270 | Avobenzone                | 70356-09-1  | 295 | Tolfenamic Acid       | 13710-19-5  |
| 271 | Amlodipine                | 88150-42-9  | 296 | Pranoprofen           | 52549-17-4  |
| 272 | Metronidazole             | 443-48-1    | 297 | Sulphadimethoxine     | 122-11-2    |
| 273 | Flutamide                 | 13311-84-7  | 298 | Rimantadine           | 13392-28-4  |
| 274 | Fluvastatin Sodium        | 93957-55-2  | 299 | Primidone             | 125-33-7    |
| 275 | Tioconazole               | 65899-73-2  | 300 | Nefiracetam           | 77191-36-7  |

|     |                                         |             |     |                              |             |
|-----|-----------------------------------------|-------------|-----|------------------------------|-------------|
| 301 | Nicorandil                              | 65141-46-0  | 326 | Uridine                      | 58-96-8     |
| 302 | Tamoxifen Citrate                       | 54965-24-1  | 327 | Flunarizine 2HCl             | 30484-77-6  |
| 303 | Meglumine                               | 6284-40-8   | 328 | Fenticonazole Nitrate        | 73151-29-8  |
| 304 | Aripiprazole                            | 129722-12-9 | 329 | Rebamipide                   | 90098-04-7  |
| 305 | Sarafloxacin HCl                        | 91296-87-6  | 330 | Epalrestat                   | 82159-09-9  |
| 306 | Methscopolamine                         | 155-41-9    | 331 | Aspartame                    | 22839-47-0  |
| 307 | Amiodarone HCl                          | 19774-82-4  | 332 | Candesartan Cilexetil        | 145040-37-5 |
| 308 | Meclizine 2HCl                          | 1104-22-9   | 333 | Phentolamine Mesylate        | 65-28-1     |
| 309 | Mometasone furoate                      | 83919-23-7  | 334 | Nimesulide                   | 51803-78-2  |
| 310 | Propylthiouracil                        | 51-52-5     | 335 | Dyclonine HCl                | 536-43-6    |
| 311 | Fluticasone propionate                  | 80474-14-2  | 336 | Cyproterone Acetate          | 427-51-0    |
| 312 | Lacidipine                              | 103890-78-4 | 337 | Memantine HCl                | 41100-52-1  |
| 313 | Elvitegravir (GS-9137, JTK-303)         | 697761-98-1 | 338 | Cyproheptadine HCl           | 969-33-5    |
| 314 | Maraviroc                               | 376348-65-1 | 339 | Doxifluridine                | 3094-09-5   |
| 315 | Raltegravir (MK-0518)                   | 518048-05-0 | 340 | Pioglitazone HCl             | 112529-15-4 |
| 316 | Pyrimethamine                           | 58-14-0     | 341 | Lornoxicam                   | 70374-39-9  |
| 317 | Sulindac                                | 38194-50-2  | 342 | Captopril                    | 62571-86-2  |
| 318 | Pramipexole dihydrochloride monohydrate | 191217-81-9 | 343 | Oxytetracycline Dihydrate    | 6153-64-6   |
| 319 | Mirtazapine                             | 85650-52-8  | 344 | Orphenadrine Citrate         | 4682-36-4   |
| 320 | Benidipine HCl                          | 91599-74-5  | 345 | Gimeracil                    | 103766-25-2 |
| 321 | Formoterol Hemifumarate                 | 43229-80-7  | 346 | Cyclophosphamide Monohydrate | 6055-19-2   |
| 322 | Chlormezanone                           | 80-77-3     | 347 | Tolnaftate                   | 2398-96-1   |
| 323 | Ketotifen Fumarate                      | 34580-14-8  | 348 | Terazosin HCl                | 70024-40-7  |
| 324 | Urapidil HCl                            | 64887-14-5  | 349 | Bromhexine HCl               | 611-75-6    |
| 325 | Diclazuril                              | 101831-37-2 | 350 | Lovastatin                   | 75330-75-5  |

|     |                                |             |     |                                 |             |
|-----|--------------------------------|-------------|-----|---------------------------------|-------------|
| 351 | Tiopronin                      | 1953-02-2   | 376 | Gabexate Mesylate               | 56974-61-9  |
| 352 | Balofloxacin                   | 127294-70-6 | 377 | Rasagiline Mesylate             | 161735-79-1 |
| 353 | Lafutidine                     | 118288-08-7 | 378 | Naltrexone HCl                  | 16676-29-2  |
| 354 | Moxonidine                     | 75438-57-2  | 379 | Levosulpiride                   | 23672-07-3  |
| 355 | Ozagrel HCl                    | 78712-43-3  | 380 | Flunixin Meglumin               | 42461-84-7  |
| 356 | Argatroban                     | 74863-84-6  | 381 | Imidapril HCl                   | 89371-37-9  |
| 357 | Mecarbinat                     | 15574-49-9  | 382 | Vinpocetine                     | 42971-09-5  |
| 358 | Rosiglitazone HCl              | 302543-62-0 | 383 | Lapatinib                       | 231277-92-2 |
| 359 | Atorvastatin Calcium           | 134523-03-8 | 384 | Cisatracurium Besylate          | 96946-42-8  |
| 360 | Famotidine                     | 76824-35-6  | 385 | Dronedarone HCl                 | 141625-93-6 |
| 361 | Moexipril HCl                  | 82586-52-5  | 386 | Conivaptan HCl                  | 168626-94-6 |
| 362 | Clevidipine Butyrate           | 167221-71-8 | 387 | Ibutilide Fumarate              | 122647-32-9 |
| 363 | Cilazapril Monohydrate         | 92077-78-6  | 388 | Probucol                        | 23288-49-5  |
| 364 | Adiphenine HCl                 | 50-42-0     | 389 | Licofelone                      | 156897-06-2 |
| 365 | Duloxetine HCl                 | 136434-34-9 | 390 | Dextrose                        | 50-99-7     |
| 366 | Trimebutine                    | 39133-31-8  | 391 | Xylose                          | 25990-60-7  |
| 367 | Ivabradine HCl                 | 148849-67-6 | 392 | Mestranol                       | 72-33-3     |
| 368 | Rivastigmine Tartrate          | 129101-54-8 | 393 | Naftopidil                      | 57149-07-2  |
| 369 | Dexmedetomidine HCl (Precedex) | 145108-58-3 | 394 | S- (+)-Rolipram                 | 85416-73-5  |
| 370 | Betaxolol                      | 659-18-7    | 395 | Bazedoxifene HCl                | 198480-56-7 |
| 371 | Detomidine HCl                 | 90038-01-0  | 396 | Atropine                        | 5908-99-6   |
| 372 | Almotriptan Malate             | 181183-52-8 | 397 | Roflumilast                     | 162401-32-3 |
| 373 | Ambrisentan                    | 177036-94-1 | 398 | Neratinib (HKI-272)             | 698387-09-6 |
| 374 | Bexarotene                     | 153559-49-0 | 399 | LDE225 (NVP-LDE225,Erismodegib) | 956697-53-3 |
| 375 | Temocapril HCl                 | 110221-44-8 | 400 | Sitafloxacin Hydrate            | 163253-35-8 |

|     |                                          |               |     |                               |             |
|-----|------------------------------------------|---------------|-----|-------------------------------|-------------|
| 401 | Dabigatran Etexilate                     | 211915-06-9   | 426 | Orotic acid (6-Carboxyuracil) | 65-86-1     |
| 402 | Taladegib (LY2940680)                    | 1258861-20-9  | 427 | Piperine                      | 94-62-2     |
| 403 | Tebipenem Pivoxil                        | 161715-24-8   | 428 | Rutin                         | 153-18-4    |
| 404 | Bazedoxifene Acetate                     | 198481-33-3   | 429 | Silibinin                     | 22888-70-6  |
| 405 | Rosuvastatin Calcium                     | 147098-20-2   | 430 | D-Mannitol                    | 69-65-8     |
| 406 | Telotristat Etiprate (LX 1606 Hippurate) | 11137608-69-5 | 431 | L-carnitine                   | 541-15-1    |
| 407 | LY2784544                                | 1229236-86-5  | 432 | Sorbitol                      | 50-70-4     |
| 408 | MLN2238                                  | 1072833-77-2  | 433 | Tolbutamide                   | 64-77-7     |
| 409 | Aliskiren Hemifumarate                   | 173334-58-2   | 434 | Levosimendan                  | 141505-33-1 |
| 410 | R788 (Fostamatinib) Disodium             | 1025687-58-4  | 435 | Amantadine HCl                | 665-66-7    |
| 411 | Formestane                               | 566-48-3      | 436 | Amfebutamone HCl              | 31677-93-7  |
| 412 | Mubritinib (TAK 165)                     | 366017-09-6   | 437 | Benserazide HCl               | 14919-77-8  |
| 413 | Irinotecan HCl Trihydrate                | 136572-09-3   | 438 | Bupivacaine HCl               | 18010-40-7  |
| 414 | Apatinib                                 | 811803-05-1   | 439 | Bethanechol chloride          | 590-63-6    |
| 415 | CAL-101 (Idelalisib, GS-1101)            | 870281-82-6   | 440 | Chlorpromazine HCl            | 69-09-0     |
| 416 | Eltrombopag Olamine                      | 496775-62-3   | 441 | Clindamycin HCl               | 21462-39-5  |
| 417 | LY2157299                                | 700874-72-2   | 442 | Clonidine HCl                 | 4205-91-8   |
| 418 | Esomeprazole Sodium                      | 161796-78-7   | 443 | Clozapine                     | 5786-21-0   |
| 419 | Volasertib (BI 6727)                     | 755038-65-4   | 444 | Pramipexole                   | 104632-26-0 |
| 420 | Fesoterodine Fumarate                    | 286930-03-8   | 445 | Domperidone                   | 57808-66-9  |
| 421 | CX-4945 (Silmitasertib)                  | 1009820-21-6  | 446 | Estriol                       | 50-27-1     |
| 422 | Artemether                               | 71963-77-4    | 447 | Famciclovir                   | 104227-87-4 |
| 423 | Cyclosporin A                            | 59865-13-3    | 448 | Fluocinolone Acetonide        | 67-73-2     |
| 424 | DL-Carnitine HCl                         | 461-05-2      | 449 | Gallamine Triethiodide        | 65-29-2     |
| 425 | Nalidixic acid                           | 389-08-2      | 450 | Imatinib (STI571)             | 152459-95-5 |

|     |                                |             |     |                               |             |
|-----|--------------------------------|-------------|-----|-------------------------------|-------------|
| 451 | Itraconazole                   | 84625-61-6  | 476 | Spectinomycin HCl             | 21736-83-4  |
| 452 | Lincomycin HCl                 | 859-18-7    | 477 | Sulfadoxine                   | 2447-57-6   |
| 453 | Loperamide HCl                 | 34552-83-5  | 478 | Tenoxicam                     | 59804-37-4  |
| 454 | Manidipine                     | 89226-50-6  | 479 | Vardenafil HCl<br>Trihydrate  | 224785-90-4 |
| 455 | Manidipine<br>2HCl             | 89226-75-5  | 480 | Xylazine HCl                  | 23076-35-9  |
| 456 | Milrinone                      | 78415-72-2  | 481 | Maprotiline HCl               | 10347-81-6  |
| 457 | Mitoxantrone<br>HCl            | 70476-82-3  | 482 | Naphazoline HCl               | 550-99-2    |
| 458 | Moroxydine HCl                 | 3160-91-6   | 483 | Epinephrine<br>Bitartrate     | 51-42-3     |
| 459 | Mycophenolic<br>acid           | 24280-93-1  | 484 | L-Adrenaline                  | 51-43-4     |
| 460 | Nateglinide                    | 105816-04-4 | 485 | Phenytoin sodium              | 630-93-3    |
| 461 | Nitrendipine                   | 39562-70-4  | 486 | Phenytoin                     | 57-41-0     |
| 462 | Novobiocin<br>Sodium           | 1476-53-5   | 487 | Ciclopirox                    | 29342-05-0  |
| 463 | Olanzapine                     | 132539-06-1 | 488 | Dopamine HCl                  | 62-31-7     |
| 464 | Olopatadine HCl                | 140462-76-6 | 489 | Ritodrine HCl                 | 23239-51-2  |
| 465 | Oxymetazoline<br>hydrochloride | 2315-02-8   | 490 | Isoconazole nitrate           | 24168-96-5  |
| 466 | Ozagrel                        | 82571-53-7  | 491 | Econazole nitrate             | 24169-02-6  |
| 467 | Pancuronium<br>dibromide       | 15500-66-0  | 492 | Miconazole                    | 22916-47-8  |
| 468 | Phenoxybenzami<br>ne HCl       | 63-92-3     | 493 | Secnidazole                   | 3366-95-8   |
| 469 | Propafenone HCl                | 34183-22-7  | 494 | Acetanilide                   | 103-84-4    |
| 470 | Racecadotril                   | 81110-73-8  | 495 | Clomipramine HCl              | 17321-77-6  |
| 471 | Ribavirin                      | 36791-04-5  | 496 | Phenformin HCl                | 834-28-6    |
| 472 | Rosiglitazone<br>maleate       | 155141-29-0 | 497 | Ceftiofur HCl                 | 103980-44-5 |
| 473 | Roxithromycin                  | 80214-83-1  | 498 | Tiotropium Bromide<br>hydrate | 139404-48-1 |
| 474 | Scopolamine<br>HBr             | 114-49-8    | 499 | Trospium chloride             | 10405-02-4  |
| 475 | Sotalol                        | 959-24-0    | 500 | Tolterodine tartrate          | 124937-52-6 |



|     |                                   |             |     |                                      |              |
|-----|-----------------------------------|-------------|-----|--------------------------------------|--------------|
| 501 | Sulbactam sodium                  | 69388-84-7  | 526 | Dimethyl Fumarate                    | 624-49-7     |
| 502 | Azelastine HCl                    | 79307-93-0  | 527 | Miglitol                             | 72432-03-2   |
| 503 | 5-Aminolevulinic acid HCl         | 5451-09-2   | 528 | Pioglitazone                         | 111025-46-8  |
| 504 | Clarithromycin                    | 81103-11-9  | 529 | Tolvaptan                            | 150683-30-0  |
| 505 | Rosiglitazone                     | 122320-73-4 | 530 | Pramiracetam                         | 68497-62-1   |
| 506 | Terbinafine HCl                   | 78628-80-5  | 531 | Clindamycin palmitate HCl            | 25507-04-4   |
| 507 | Cortisone acetate                 | 50-04-4     | 532 | Oseltamivir Phosphate                | 204255-11-8  |
| 508 | Amiloride hydrochloride dihydrate | 17440-83-4  | 533 | L-Thyroxine                          | 51-48-9      |
| 509 | Clomifene citrate                 | 50-41-9     | 534 | Gliclazide                           | 21187-98-4   |
| 510 | Cloxacillin Sodium                | 7081-44-9   | 535 | Acemetacin                           | 53164-05-9   |
| 511 | Amoxicillin Sodium                | 34642-77-8  | 536 | Tioxolone                            | 4991-65-5    |
| 512 | Isoprenaline HCl                  | 51-30-9     | 537 | Idebenone                            | 58186-27-9   |
| 513 | Medroxyprogesterone acetate       | 71-58-9     | 538 | Mifepristone                         | 84371-65-3   |
| 514 | Phenylephrine HCl                 | 61-76-7     | 539 | Buflomedil HCl                       | 35543-24-9   |
| 515 | Prednisolone Acetate              | 52-21-1     | 540 | Fluocinonide                         | 356-12-7     |
| 516 | Tetracaine HCl                    | 136-47-0    | 541 | Lonidamine                           | 50264-69-2   |
| 517 | Tetracycline HCl                  | 64-75-5     | 542 | Clorsulon                            | 60200-06-8   |
| 518 | Xylometazoline HCl                | 1218-35-5   | 543 | Arecoline                            | 300-08-3     |
| 519 | Phenacetin                        | 62-44-2     | 544 | Noradrenaline bitartrate monohydrate | 108341-18-0  |
| 520 | Zidovudine                        | 30516-87-1  | 545 | Fostamatinib (R788)                  | 901119-35-5  |
| 521 | Quinapril HCl                     | 82586-55-8  | 546 | GSK2126458 (GSK458)                  | 1086062-66-9 |
| 522 | Trazodone HCl                     | 25332-39-2  | 547 | Ciprofibrate                         | 52214-84-3   |
| 523 | Thiamphenicol                     | 15318-45-3  | 548 | Dolutegravir (GSK1349572)            | 1051375-16-6 |
| 524 | Clobetasol propionate             | 25122-46-7  | 549 | Trametinib (GSK1120212)              | 871700-17-3  |
| 525 | Brompheniramine hydrogen maleate  | 980-71-2    | 550 | Ibrutinib (PCI-32765)                | 936563-96-1  |

|     |                                      |              |     |                                        |              |
|-----|--------------------------------------|--------------|-----|----------------------------------------|--------------|
| 551 | Resminostat                          | 864814-88-0  | 576 | S-Ruxolitinib (INCB018424)             | 941685-37-6  |
| 552 | Nilvadipine                          | 75530-68-6   | 577 | Pirfenidone                            | 53179-13-8   |
| 553 | Dacomitinib (PF299804, PF299)        | 1110813-31-4 | 578 | Evacetrapib (LY2484595)                | 1186486-62-3 |
| 554 | Crenolanib (CP-868596)               | 670220-88-9  | 579 | Carbazochrome sodium sulfonate (AC-17) | 51460-26-5   |
| 555 | TG101348 (SAR302503)                 | 936091-26-8  | 580 | Clevudine                              | 163252-36-6  |
| 556 | Tivantinib (ARQ 197)                 | 905854-02-6  | 581 | Rivaroxaban                            | 366789-02-8  |
| 557 | Varlitinib                           | 845272-21-1  | 582 | Paroxetine HCl                         | 78246-49-8   |
| 558 | TH-302                               | 918633-87-1  | 583 | Zaltoprofen                            | 74711-43-6   |
| 559 | Canagliflozin                        | 842133-18-0  | 584 | Pazopanib                              | 444731-52-6  |
| 560 | Dinacilib (SCH727965)                | 779353-01-4  | 585 | Amoxicillin                            | 26787-78-0   |
| 561 | Dovitinib (TKI-258) Dilactic Acid    | 852433-84-2  | 586 | Aspirin                                | 50-78-2      |
| 562 | Tofacitinib (CP-690550, Tasocitinib) | 477600-75-2  | 587 | Niflumic acid                          | 4394-00-7    |
| 563 | Sotrastaurin                         | 425637-18-9  | 588 | Ciclopirox ethanolamine                | 41621-49-2   |
| 564 | Sofosbuvir (PSI-7977, GS-7977)       | 1190307-88-0 | 589 | Rimonabant                             | 168273-06-1  |
| 565 | Lonafarnib                           | 193275-84-2  | 590 | Cabazitaxel                            | 183133-96-2  |
| 566 | Galeterone                           | 851983-85-2  | 591 | Bufexamac                              | 2438-72-4    |
| 567 | Dabrafenib (GSK2118436)              | 1195765-45-7 | 592 | Lamotrigine                            | 84057-84-1   |
| 568 | BYL719                               | 1217486-61-7 | 593 | Linagliptin                            | 668270-12-0  |
| 569 | Tideglusib                           | 865854-05-3  | 594 | Bindarit                               | 130641-38-2  |
| 570 | Clindamycin                          | 18323-44-9   | 595 | Vildagliptin (LAF-237)                 | 274901-16-5  |
| 571 | Carfilzomib (PR-171)                 | 868540-17-4  | 596 | Daunorubicin HCl                       | 23541-50-6   |
| 572 | Alogliptin                           | 850649-61-5  | 597 | Pravastatin sodium                     | 81131-70-6   |
| 573 | Camostat Mesilate                    | 59721-29-8   | 598 | Bepotastine Besilate                   | 190786-44-8  |
| 574 | Prucalopride                         | 179474-81-8  | 599 | Fosaprepitant dimeglumine salt         | 265121-04-8  |
| 575 | Cobicistat (GS-9350)                 | 1004316-88-4 | 600 | Rofecoxib                              | 162011-90-7  |

|     |                             |                           |     |                       |             |
|-----|-----------------------------|---------------------------|-----|-----------------------|-------------|
| 601 | Cinepazide maleate          | 26328-04-1                | 626 | Indacaterol Maleate   | 753498-25-8 |
| 602 | Azilsartan                  | 147403-03-0               | 627 | Moguisteine           | 119637-67-1 |
| 603 | Otilonium Bromide           | 26095-59-0                | 628 | Nadifloxacin          | 124858-35-1 |
| 604 | Bosentan Hydrate            | 157212-55-0               | 629 | Pidotimod             | 121808-62-6 |
| 605 | Rupatadine Fumarate         | 182349-12-8               | 630 | Pyridoxine HCl        | 58-56-0     |
| 606 | Azelnidipine                | 123524-52-7               | 631 | Vitamin C             | 50-81-7     |
| 607 | Alverine Citrate            | 5560-59-8                 | 632 | Sulfathiazole         | 72-14-0     |
| 608 | Azilsartan Medoxomil        | 863031-21-4               | 633 | Oxybutynin chloride   | 1508-65-2   |
| 609 | Enrofloxacin                | 93106-60-6                | 634 | Ornidazole            | 16773-42-5  |
| 610 | Medetomidine HCl            | 86347-15-1                | 635 | Dexamethasone Acetate | 1177-87-3   |
| 611 | Epinephrine HCl             | 55-31-2                   | 636 | Trimethoprim          | 738-70-5    |
| 612 | Diclofenac Potassium        | 15307-81-0                | 637 | Biotin (Vitamin B7)   | 58-85-5     |
| 613 | Diclofenac Diethylamine     | 78213-16-8                | 638 | Sulfamerazine         | 127-79-7    |
| 614 | Ambroxol HCl                | 23828-92-4                | 639 | Sulfamethazine        | 57-68-1     |
| 615 | Naloxone HCl                | 357-08-4                  | 640 | Sodium salicylate     | 54-21-7     |
| 616 | Chlorhexidine HCl           | 3697-42-5                 | 641 | Methylthiouracil      | 56-04-2     |
| 617 | Piracetam                   | 7491-74-9                 | 642 | Methenamine           | 100-97-0    |
| 618 | Caspofungin Acetate         | 179463-17-3               | 643 | Milnacipran HCl       | 101152-94-7 |
| 619 | Dexmedetomidine             | 113775-47-6               | 644 | Darifenacin HBr       | 133099-07-7 |
| 620 | Foscarnet Sodium            | 63585-09-1                | 645 | Entacapone            | 130929-57-6 |
| 621 | Tazobactam                  | 89786-04-9,<br>89785-84-2 | 646 | Estradiol valerate    | 979-32-8    |
| 622 | Beclomethasone dipropionate | 5534-09-8                 | 647 | Articaine HCl         | 23964-57-0  |
| 623 | Atovaquone                  | 95233-18-4                | 648 | Gliquidone            | 33342-05-1  |
| 624 | Etravirine (TMC125)         | 269055-15-4               | 649 | Butenafine HCl        | 101827-46-7 |
| 625 | Ulipristal                  | 159811-51-5               | 650 | Mepivacaine HCl       | 1722-62-9   |

|     |                        |             |     |                                   |              |
|-----|------------------------|-------------|-----|-----------------------------------|--------------|
| 651 | Ethynodiol diacetate   | 297-76-7    | 676 | Fexofenadine HCl                  | 153439-40-8  |
| 652 | Sertaconazole nitrate  | 99592-39-9  | 677 | Moclobemide (Ro 111163)           | 71320-77-9   |
| 653 | Tylosin tartrate       | 74610-55-2  | 678 | Pergolide mesylate                | 66104-23-2   |
| 654 | Benztropine mesylate   | 132-17-2    | 679 | Cabozantinib malate (XL184)       | 1140909-48-3 |
| 655 | Altrenogest            | 850-52-2    | 680 | Sitagliptin phosphate monohydrate | 654671-77-9  |
| 656 | Ampicillin sodium      | 69-52-3     | 681 | Lithocholic acid                  | 434-13-9     |
| 657 | Anagrelide HCl         | 58579-51-4  | 682 | Ethambutol HCl                    | 1070-11-7    |
| 658 | Antipyrine             | 60-80-0     | 683 | Doxycycline HCl                   | 10592-13-9   |
| 659 | Atomoxetine HCl        | 82248-59-7  | 684 | Pentamidine                       | 50357-45-4   |
| 660 | Betahistine 2HCl       | 5579-84-0   | 685 | Mirabegron                        | 223673-61-8  |
| 661 | Brinzolamide           | 138890-62-7 | 686 | Acebutolol HCl                    | 34381-68-5   |
| 662 | Carbenicillin disodium | 4800-94-6   | 687 | Ampiroxicam                       | 99464-64-9   |
| 663 | Eletriptan HBr         | 177834-92-3 | 688 | Desloratadine                     | 100643-71-8  |
| 664 | Flumequine             | 42835-25-6  | 689 | Hyoscyamine                       | 101-31-5     |
| 665 | Amitriptyline HCl      | 549-18-8    | 690 | Allylthiourea                     | 109-57-9     |
| 666 | Adrenalone HCl         | 62-13-5     | 691 | Avanafil                          | 330784-47-9  |
| 667 | Azatadine dimaleate    | 3978-86-7   | 692 | Sodium Picosulfate                | 10040-45-6   |
| 668 | (+,-)-Octopamine HCl   | 770-05-8    | 693 | Tolcapone                         | 134308-13-7  |
| 669 | Ropinirole HCl         | 91374-20-8  | 694 | Probenecid                        | 57-66-9      |
| 670 | Azlocillin sodium salt | 37091-65-9  | 695 | Procaine HCl                      | 51-05-8      |
| 671 | Azacyclonol            | 115-46-8    | 696 | Homatropine Methylbromide         | 80-49-9      |
| 672 | Reboxetine mesylate    | 98769-84-7  | 697 | Homatropine Bromide               | 51-56-9      |
| 673 | Triflusal              | 322-79-2    | 698 | Hydroxyzine 2HCl                  | 2192-20-3    |
| 674 | Trifluoperazine 2HCl   | 440-17-5    | 699 | Aclidinium Bromide                | 320345-99-1  |
| 675 | Meptazinol HCl         | 59263-76-2  | 700 | Diphemanil Methylsulfate          | 62-97-5      |

|     |                             |             |     |                          |                             |
|-----|-----------------------------|-------------|-----|--------------------------|-----------------------------|
| 701 | Vitamin D2                  | 50-14-6     | 726 | Vitamin D3               | 67-97-0                     |
| 702 | Doxapram HCl                | 7081-53-0   | 727 | Escitalopram Oxalate     | 219861-08-2                 |
| 703 | Dibucaine HCl               | 61-12-1     | 728 | Guanabenz Acetate        | 23256-50-0                  |
| 704 | Methazolamide               | 554-57-4    | 729 | Tinidazole               | 19387-91-8                  |
| 705 | Norethindrone               | 68-22-4     | 730 | Guanidine HCl            | 50-01-1                     |
| 706 | Olsalazine Sodium           | 6054-98-4   | 731 | Griseofulvin             | 126-07-8                    |
| 707 | Nafcillin Sodium            | 7177-50-6   | 732 | Decamethonium Bromide    | 541-22-0                    |
| 708 | Tetrahydrozoline HCl        | 522-48-5    | 733 | Sodium 4-Aminosalicylate | 133-10-8                    |
| 709 | Toltrazuril                 | 69004-03-1  | 734 | Sodium Nitrite           | 7632-00-0                   |
| 710 | Pheniramine Maleate         | 132-20-7    | 735 | Zinc Pyrithione          | 13463-41-7                  |
| 711 | Estradiol Cypionate         | 313-06-4    | 736 | Propranolol HCl          | 318-98-9                    |
| 712 | Bisacodyl                   | 30652-11-0  | 737 | Mequinol                 | 150-76-5                    |
| 713 | Carbimazole                 | 22232-54-8  | 738 | Mefenamic Acid           | 61-68-7                     |
| 714 | Valdecoxib                  | 181695-72-7 | 739 | Ticagrelor               | 274693-27-5                 |
| 715 | Valganciclovir HCl          | 175865-59-5 | 740 | Triamterene              | 396-01-0                    |
| 716 | Nabumetone                  | 42924-53-8  | 741 | Sulfacetamide Sodium     | 127-56-0                    |
| 717 | Sertraline HCl              | 79559-97-0  | 742 | Spiramycin               | 8025-81-8                   |
| 718 | Spirolactone                | 52-01-7     | 743 | Lomerizine HCl           | 101477-54-7,<br>101477-55-8 |
| 719 | Retapamulin                 | 224452-66-8 | 744 | Levobetaxolol HCl        | 116209-55-3,<br>93221-48-8  |
| 720 | Methyclothiazide            | 135-07-9    | 745 | Loxapine Succinate       | 27833-64-3                  |
| 721 | Ropivacaine HCl             | 98717-15-8  | 746 | Flumethasone             | 2135-17-3                   |
| 722 | Sodium Nitroprusside        | 14402-89-2  | 747 | Halobetasol Propionate   | 66852-54-8                  |
| 723 | Erythromycin Ethylsuccinate | 1264-62-6   | 748 | Fenspiride HCl           | 5053-08-7,<br>5053-06-5     |
| 724 | Levobupivacaine HCl         | 27262-48-2  | 749 | Pramoxine HCl            | 637-58-1                    |
| 725 | Ronidazole                  | 7681-76-7   | 750 | Difluprednate            | 23674-86-4                  |

|     |                             |                           |     |                               |             |
|-----|-----------------------------|---------------------------|-----|-------------------------------|-------------|
| 751 | Droperidol                  | 548-73-2                  | 776 | Cyclizine 2HCl                | 5897-18-7   |
| 752 | Dydrogesterone              | 152-62-5                  | 777 | Dinitolmide                   | 148-01-6    |
| 753 | Halcinonide                 | 3093-35-4                 | 778 | Clopidol                      | 2971-90-6   |
| 754 | Dexlansoprazole             | 138530-94-6               | 779 | Bacitracin                    | 1405-87-4   |
| 755 | Esmolol HCl                 | 81161-17-3,<br>81147-92-4 | 780 | Azithromycin<br>Dihydrate     | 117772-70-0 |
| 756 | Voglibose                   | 83480-29-9                | 781 | Ampicillin<br>Trihydrate      | 7177-48-2   |
| 757 | Eprosartan<br>Mesylate      | 144143-96-4               | 782 | Amfenac Sodium<br>Monohydrate | 61618-27-7  |
| 758 | Closantel<br>Sodium         | 61438-64-0                | 783 | Penfluridol                   | 26864-56-2  |
| 759 | Closantel                   | 57808-65-8                | 784 | Ethamsylate                   | 2624-44-4   |
| 760 | Clofazimine                 | 2030-63-9                 | 785 | Chlorzoxazone                 | 95-25-0     |
| 761 | Estradiol<br>Benzoate       | 50-50-0                   | 786 | Chlortetracycline<br>HCl      | 64-72-2     |
| 762 | Dicloxacillin<br>Sodium     | 13412-64-1                | 787 | Bezafibrate                   | 41859-67-0  |
| 763 | Desvenlafaxine<br>Succinate | 386750-22-7               | 788 | Penicillin G Sodium           | 69-57-8     |
| 764 | Desvenlafaxine              | 93413-62-8                | 789 | Benzoic Acid                  | 65-85-0     |
| 765 | Triclabendazole             | 68786-66-3                | 790 | Benzethonium<br>Chloride      | 121-54-0    |
| 766 | Histamine 2HCl              | 56-92-8                   | 791 | Doxofylline                   | 69975-86-6  |
| 767 | Sulconazole<br>Nitrate      | 82382-23-8                | 792 | Benzydamine HCl               | 132-69-4    |
| 768 | Tilmicosin                  | 108050-54-0               | 793 | Chlorpropamide                | 94-20-2     |
| 769 | Timolol Maleate             | 26921-17-5                | 794 | Cyromazine                    | 66215-27-8  |
| 770 | Tolazoline HCl              | 59-97-2                   | 795 | Teriflunomide                 | 108605-62-5 |
| 771 | Sodium<br>Phenylbutyrate    | 1716-12-7                 | 796 | Coumarin                      | 91-64-5     |
| 772 | Troxipide                   | 30751-05-4                | 797 | Choline Chloride              | 67-48-1     |
| 773 | Clorprenaline<br>HCl        | 6933-90-0                 | 798 | Cetylpyridinium<br>Chloride   | 123-03-5    |
| 774 | Carprofen                   | 53716-49-7                | 799 | Sulfaguanidine                | 57-67-0     |
| 775 | Dropropizine                | 17692-31-8                | 800 | Trometamol                    | 77-86-1     |

|     |                                 |            |     |                              |             |
|-----|---------------------------------|------------|-----|------------------------------|-------------|
| 801 | Uracil                          | 66-22-8    | 826 | Benzocaine                   | 94-09-7     |
| 802 | Climbazole                      | 38083-17-9 | 827 | Montelukast Sodium           | 151767-02-1 |
| 803 | Mezlocillin Sodium              | 42057-22-7 | 828 | Dirithromycin                | 62013-04-1  |
| 804 | Nicardipine HCl                 | 54527-84-3 | 829 | Valnemulin HCl               | 133868-46-9 |
| 805 | Nifuroxazide                    | 965-52-6   | 830 | Liothyronine Sodium          | 55-06-1     |
| 806 | Penciclovir                     | 39809-25-1 | 831 | Amoxapine                    | 14028-44-5  |
| 807 | Tiratricol                      | 51-24-1    | 832 | Azaperone                    | 1649-18-9   |
| 808 | Domiphen Bromide                | 538-71-6   | 833 | Bosentan                     | 147536-97-8 |
| 809 | Cyclandelate                    | 456-59-7   | 834 | Benzbromarone                | 3562-84-3   |
| 810 | Cinchophen                      | 132-60-5   | 835 | Piperacillin Sodium          | 59703-84-3  |
| 811 | Betamipron                      | 3440-28-6  | 836 | Mevastatin                   | 73573-88-3  |
| 812 | Chlorquinaldol                  | 72-80-0    | 837 | Mexiletine HCl               | 5370-01-4   |
| 813 | Broxyquinoline                  | 521-74-4   | 838 | Fidaxomicin                  | 873857-62-6 |
| 814 | Ethacridine lactate monohydrate | 6402-23-9  | 839 | Fluorometholone Acetate      | 3801-06-7   |
| 815 | Bemegride                       | 64-65-3    | 840 | Oxybuprocaine HCl            | 5987-82-6   |
| 816 | Aminothiazole                   | 96-50-4    | 841 | Oxaprozin                    | 21256-18-8  |
| 817 | Antazoline HCl                  | 2508-72-7  | 842 | Zoxazolamine                 | 61-80-3     |
| 818 | Tolperisone HCl                 | 3644-61-9  | 843 | Phenazopyridine HCl          | 136-40-3    |
| 819 | Florfenicol                     | 73231-34-2 | 844 | Doxylamine Succinate         | 562-10-7    |
| 820 | Furaltadone HCl                 | 3759-92-0  | 845 | Cetrimonium Bromide (CTAB)   | 57-09-0     |
| 821 | Isosorbide                      | 652-67-5   | 846 | Deoxycorticosterone acetate  | 56-47-3     |
| 822 | Cysteamine HCl                  | 156-57-0   | 847 | Serotonin HCl                | 153-98-0    |
| 823 | Clofibric Acid                  | 882-09-7   | 848 | Tranlycypromine (2-PCPA) HCl | 4548-34-9   |
| 824 | Chromocarb                      | 4940-39-0  | 849 | Prucalopride Succinat        | 179474-85-2 |
| 825 | Chlorocresol                    | 59-50-7    | 850 | Bromfenac Sodium             | 91714-93-1  |

|     |                          |             |     |                                        |            |
|-----|--------------------------|-------------|-----|----------------------------------------|------------|
| 851 | Sulfamethoxypyridazine   | 80-35-3     | 876 | Meclofenamate Sodium                   | 6385-02-0  |
| 852 | Epinastine HCl           | 108929-04-0 | 877 | Salmeterol Xinafoate                   | 94749-08-3 |
| 853 | Buspirone HCl            | 33386-08-2  | 878 | Mupirocin                              | 12650-69-0 |
| 854 | Luliconazole             | 187164-19-8 | 879 | (R)-(+)-Atenolol                       | 56715-13-0 |
| 855 | Tamibarotene             | 94497-51-5  | 880 | Anisotropine Methylbromide             | 80-50-2    |
| 856 | Ebastine                 | 90729-43-4  | 881 | Dehydrocholic acid                     | 81-23-2    |
| 857 | Diacerein                | 13739-02-1  | 882 | Diethylcarbamazine (citrate)           | 1642-54-2  |
| 858 | Flufenamic acid          | 530-78-9    | 883 | Diiodohydroxyquinoline                 | 83-73-8    |
| 859 | Vinorelbine Tartrate     | 125317-39-7 | 884 | DL-Panthenol                           | 16485-10-2 |
| 860 | Oxiracetam               | 62613-82-5  | 885 | Fluphenazine (dihydrochloride)         | 146-56-5   |
| 861 | Rotigotine               | 99755-59-6  | 886 | Halothane                              | 151-67-7   |
| 862 | Carteolol HCl            | 51781-21-6  | 887 | Hexylresorcinol                        | 136-77-6   |
| 863 | Demeclocycline HCl       | 64-73-3     | 888 | Piperazine                             | 110-85-0   |
| 864 | Nelfinavir Mesylate      | 159989-65-8 | 889 | Sulfabenzamide                         | 127-71-9   |
| 865 | Cyclobenzaprine HCl      | 6202-23-9   | 890 | Terpin (hydrate)                       | 2451-01-6  |
| 866 | Ospemifene               | 128607-22-7 | 891 | Tyloxapol                              | 25301-02-4 |
| 867 | Anidulafungin (LY303366) | 166663-25-8 | 892 | Resorcinol                             | 108-46-3   |
| 868 | Micafungin Sodium        | 208538-73-2 | 893 | Hydroquinone                           | 123-31-9   |
| 869 | Chloroambucil            | 305-03-3    | 894 | Triacetin                              | 102-76-1   |
| 870 | Metoclopramide HCl       | 7232-21-5   | 895 | Butamben                               | 94-25-7    |
| 871 | Digoxin                  | 20830-75-5  | 896 | Butylparaben                           | 94-26-8    |
| 872 | Labetalol HCl            | 32780-64-6  | 897 | Succinylsulfathiazole                  | 116-43-8   |
| 873 | Diphenidol HCl           | 3254-89-5   | 898 | Docusate Sodium                        | 577-11-7   |
| 874 | Promethazine HCl         | 58-33-3     | 899 | Amodiaquin (dihydrochloride dihydrate) | 6398-98-7  |
| 875 | Procainamide HCl         | 614-39-1    | 900 | Nitroxoline                            | 4008-48-4  |



|     |                                         |             |     |                                 |             |
|-----|-----------------------------------------|-------------|-----|---------------------------------|-------------|
| 901 | Chlormadinone acetate                   | 302-22-7    | 926 | (+/-)-Sulfinpyrazone            | 57-96-5     |
| 902 | Cephalothin                             | 58-71-9     | 927 | Chlorotrianisene                | 569-57-3    |
| 903 | Cefazolin Sodium                        | 27164-46-1  | 928 | Diazoxide                       | 364-98-7    |
| 904 | Cefixime                                | 79350-37-1  | 929 | Prochlorperazine dimaleate salt | 84-02-6     |
| 905 | Lercanidipine (hydrochloride)           | 132866-11-6 | 930 | Hexachlorophene                 | 70-30-4     |
| 906 | Benzyl benzoate                         | 120-51-4    | 931 | Isosorbide Mononitrate          | 16051-77-7  |
| 907 | Benzyl alcohol                          | 100-51-6    | 932 | Sodium sulfadiazine             | 547-32-0    |
| 908 | 5-Chloro-8-hydroxy-7-iodoquinoline      | 130-26-7    | 933 | Cyproheptadine hydrochloride    | 41354-29-4  |
| 909 | Acetohydroxamic acid                    | 546-88-3    | 934 | Teneligliptin hydrobromide      | 906093-29-6 |
| 910 | Gallic acid                             | 149-91-7    | 935 | Prasugrel Hydrochloride         | 389574-19-0 |
| 911 | Levofloxacin hydrate                    | 138199-71-0 | 936 | Desogestrel                     | 54024-22-5  |
| 912 | Folic acid                              | 59-30-3     | 937 | Brexpiprazole                   | 913611-97-9 |
| 913 | 2,2'-Dihydroxy-4-methoxybenzophenone    | 131-53-3    | 938 | Lesinurad                       | 878672-00-5 |
| 914 | Diflunisal                              | 22494-42-4  | 939 | Tedizolid Phosphate             | 856867-55-5 |
| 915 | Mebendazole                             | 31431-39-7  | 940 | Zolpidem                        | 82626-48-0  |
| 916 | Dapson                                  | 80-08-0     | 941 | Armodafinil                     | 112111-43-0 |
| 917 | Modafinil                               | 68693-11-8  | 942 | Ciclesonide                     | 126544-47-6 |
| 918 | Nandrolone decanoate                    | 360-70-3    | 943 | Cefmenoxime hydrochloride       | 75738-58-8  |
| 919 | Dextromethorphan (hydrobromide hydrate) | 6700-34-1   | 944 | Dantrolene sodium               | 24868-20-0  |
| 920 | Fenoldopam (mesylate)                   | 67227-57-0  | 945 | Atipamezole hydrochloride       | 104075-48-1 |
| 921 | Itopride hydrochloride                  | 122892-31-3 | 946 | Atipamezole                     | 104054-27-5 |
| 922 | Cefuroxime sodium                       | 56238-63-2  | 947 | Etoricoxib                      | 202409-33-4 |
| 923 | 5,5-Dimethylloxazolidine-2,4-dione      | 3166-62-9   | 948 | Sulisobenzone                   | 4065-45-6   |
| 924 | Alcaftadine                             | 147084-10-4 | 949 | Sulpiride                       | 15676-16-1  |
| 925 | Ethosuximide                            | 77-67-8     | 950 | Parecoxib                       | 198470-84-7 |

|     |                              |              |      |                                 |              |
|-----|------------------------------|--------------|------|---------------------------------|--------------|
| 951 | Eslicarbazepine Acetate      | 236395-14-5  | 976  | Rivastigmine                    | 123441-03-2  |
| 952 | Hydroquinidine               | 1435-55-8    | 977  | Perampanel                      | 380917-97-5  |
| 953 | Nandrolone                   | 434-22-0     | 978  | Deoxycholic acid                | 83-44-3      |
| 954 | Glycopyrrolate               | 596-51-0     | 979  | Escin                           | 6805-41-0    |
| 955 | Tiagabine hydrochloride      | 145821-59-6  | 980  | Oxybenzone                      | 131-57-7     |
| 956 | Atazanavir                   | 198904-31-3  | 981  | Guanfacine Hydrochloride        | 29110-48-3   |
| 957 | Fusidate Sodium              | 751-94-0     | 982  | D panthenol                     | 81-13-0      |
| 958 | Molsidomine                  | 25717-80-0   | 983  | ArbinoxaMine Maleate            | 3505-38-2    |
| 959 | Rebeprazole sodium           | 117976-90-6  | 984  | Saxagliptin hydrate             | 945667-22-1  |
| 960 | Sivelestat sodium            | 201677-61-4  | 985  | Tofacitinib (CP-690550) Citrate | 540737-29-9  |
| 961 | Lidocaine hydrochloride      | 73-78-9      | 986  | Fingolimod (FTY720) HCl         | 162359-56-0  |
| 962 | Procaine                     | 59-46-1      | 987  | Tacrolimus (FK506)              | 104987-11-3  |
| 963 | Benzocaine hydrochloride     | 23239-88-5   | 988  | Pimecrolimus                    | 137071-32-0  |
| 964 | Etonogestrel                 | 54048-10-1   | 989  | MEK162 (ARRY-162, ARRY-438162)  | 606143-89-9  |
| 965 | Hydroxyprogesterone caproate | 630-56-8     | 990  | Birinapant                      | 1260251-31-7 |
| 966 | Tiagabine                    | 115103-54-3  | 991  | Embelin                         | 550-24-3     |
| 967 | Gluconolactone               | 90-80-2      | 992  | IPI-145 (INK1197)               | 1201438-56-3 |
| 968 | Fluoxymesterone              | 76-43-7      | 993  | Tepotinib (EMD 1214063)         | 1100598-32-0 |
| 969 | Povidone iodine              | 25655-41-8   | 994  | Cilengitide                     | 188968-51-6  |
| 970 | Terazosin                    | 63074-08-8   | 995  | LDK378                          | 1032900-25-6 |
| 971 | Protirelin                   | 24305-27-9   | 996  | EPZ-6438                        | 1403254-99-8 |
| 972 | Loxoprofen                   | 68767-14-6   | 997  | Batimastat (BB-94)              | 130370-60-4  |
| 973 | Sildenafil Mesylate          | 1308285-21-3 | 998  | Marimastat(BB-2516)             | 154039-60-8  |
| 974 | Efavirenz                    | 154598-52-4  | 999  | Ilomastat (GM6001, Galardin)    | 142880-36-2  |
| 975 | Vitamin E                    | 59-02-9      | 1000 | LY2835219                       | 1231930-82-7 |

|      |                          |              |      |                                   |              |
|------|--------------------------|--------------|------|-----------------------------------|--------------|
| 1001 | Motolimod (VTX-2337)     | 926927-61-9  | 1026 | Cerdulatinib (PRT062070, PRT2070) | 1369761-01-2 |
| 1002 | BAF312 (Siponimod)       | 1230487-00-9 | 1027 | Lomitapide                        | 182431-12-5  |
| 1003 | Idasanutlin (RG-7388)    | 1229705-06-9 | 1028 | Pilaralisib (XL147)               | 934526-89-3  |
| 1004 | Losmapimod (GW856553X)   | 585543-15-3  | 1029 | Voxtalisib (XL765, SAR245409)     | 934493-76-2  |
| 1005 | Alvelestat (AZD9668)     | 848141-11-7  | 1030 | Defactinib (VS-6063, PF-04554878) | 1073154-85-4 |
| 1006 | KPT-330                  | 1393477-72-9 | 1031 | Obeticholic Acid                  | 459789-99-2  |
| 1007 | Vidofludimus             | 717824-30-1  | 1032 | LCZ696                            | 936623-90-4  |
| 1008 | Suvorexant (MK-4305)     | 1030377-33-3 | 1033 | Salirasib                         | 162520-00-5  |
| 1009 | Edoxaban                 | 1229194-11-9 | 1034 | Dovitinib (TKI258) Lactate        | 915769-50-5  |
| 1010 | CO-1686 (AVL-301)        | 1374640-70-6 | 1035 | Elacridar (GF120918)              | 143664-11-3  |
| 1011 | AZD9291                  | 1421373-65-0 | 1036 | Emricasan                         | 254750-02-2  |
| 1012 | Rilpivirine              | 500287-72-9  | 1037 | Sunitinib                         | 557795-19-4  |
| 1013 | Tasisulam                | 519055-62-0  | 1038 | Dasatinib Monohydrate             | 863127-77-9  |
| 1014 | Poziotinib (HM781-36B)   | 1092364-38-9 | 1039 | Erlotinib                         | 183321-74-6  |
| 1015 | Aloxistatin              | 88321-09-9   | 1040 | Docetaxel Trihydrate              | 148408-66-6  |
| 1016 | Sorafenib                | 284461-73-0  | 1041 | Pexmetinib (ARRY-614)             | 945614-12-0  |
| 1017 | Puromycin 2HCl           | 58-58-2      | 1042 | Afatinib (BIBW2992) Dimaleate     | 850140-73-7  |
| 1018 | LEE011                   | 1211441-98-3 | 1043 | Pexidartinib (PLX3397)            | 1029044-16-3 |
| 1019 | Uprosertib (GSK2141795)  | 1047634-65-0 | 1044 | CB1954                            | 21919-05-1   |
| 1020 | Trelagliptin             | 865759-25-7  | 1045 | Eliglustat Tartrate               | 491833-29-5  |
| 1021 | Afuresertib (GSK2110183) | 1047644-62-1 | 1046 | Ulixertinib (BVD-523, VRT752271)  | 869886-67-9  |
| 1022 | GS-9973                  | 1229208-44-9 | 1047 | Tenofovir Alafenamide (GS-7340)   | 379270-37-8  |
| 1023 | Ledipasvir (GS5885)      | 1256388-51-8 | 1048 | Oltipraz                          | 64224-21-1   |
| 1024 | Filgotinib (GLPG0634)    | 1206161-97-8 | 1049 | Epacadostat (INCB024360)          | 1204669-58-8 |
| 1025 | Lomitapide Mesylate      | 202914-84-9  | 1050 | Ozanimod (RPC1063)                | 1306760-87-1 |

|      |                        |              |      |                           |              |
|------|------------------------|--------------|------|---------------------------|--------------|
| 1051 | Napabucasin            | 83280-65-3   | 1054 | Rocilinostat (ACY-1215)   | 1316214-52-4 |
| 1052 | Ripasudil (K-115)      | 887375-67-9  | 1055 | Otenabant (CP-945598) HCl | 686347-12-6  |
| 1053 | Entrectinib (RXDX-101) | 1108743-60-7 | 1056 | Empagliflozin (BI 10773)  | 864070-44-0  |
